1  
2  
3  
4  
5  
6  
7  
8  
9  
10  
11  
12  
13  
14  
15  
16  
17  
18  
19  
20  
21  
22  
23  
24  
25

# **Set1-mediated histone H3K4 methylation is required for azole induction of the ergosterol biosynthesis genes and antifungal drug resistance in *Candida glabrata*.**

Kortany M. Baker<sup>1</sup>, Smriti Hoda<sup>1</sup>, Debasmita Saha<sup>1</sup>, Livia Georgescu<sup>1</sup>, Nina D. Serratore<sup>1\*</sup>, Yueping Zhang<sup>1\*</sup>, Nadia A. Lanman<sup>2,3</sup>, and Scott D. Briggs<sup>1,2,#</sup>

<sup>1</sup>*Department of Biochemistry*, <sup>2</sup>*Purdue University Center for Cancer Research and*  
<sup>3</sup>*Department of Comparative Pathobiology, Purdue University, West Lafayette, Indiana*  
*47907*

*Running Title:* Set1 mediates *ERG* gene induction and drug resistance

*Word count of abstract:*

#To whom correspondence should be addressed: Scott D. Briggs, Department of Biochemistry Hansen Life Science Research Building, 201 S. University Street, West Lafayette, IN 47907, Phone: 765-494-0112, E-mail: [sdbriggs@purdue.edu](mailto:sdbriggs@purdue.edu)

\*Footnote: Current address for Yueping Zhang and Nina Serratore  
Nina Serratore: Cook Research Incorporated, 1 Geddes Way, West Lafayette, IN 47906  
Yueping Zhang: College of Veterinary Medicine, China Agricultural University,  
No. 2 Yuanmingyuan West Road, Haidian District, Beijing 100193, China

## 26 **ABSTRACT**

27 *Candida glabrata* is an opportunistic pathogen that has developed the ability to  
28 adapt and thrive under azole treated conditions. The common mechanisms that can  
29 result in *Candida* drug resistance are due to mutations or overexpression of the drug  
30 efflux pump or the target of azole drugs, Cdr1 and Erg11, respectively. However, the  
31 role of epigenetic histone modifications in azole-induced gene expression and drug  
32 resistance are poorly understood in *C. glabrata*. In this study, we show for the first time  
33 that Set1 mediates histone H3K4 mono-, di-, and trimethylation in *C. glabrata*. In  
34 addition, loss of *SET1* and histone H3K4 methylation results in increased susceptibility  
35 to azole drugs in both *C. glabrata* and *S. cerevisiae*. Intriguingly, this increase in  
36 susceptibility to azole drugs in strains lacking Set1-mediated histone H3K4 methylation  
37 is not due to altered transcript levels of *CDR1*, *PDR1* or Cdr1's ability to efflux drugs.  
38 Genome-wide transcript analysis revealed that Set1 is necessary for azole-induced  
39 expression of 12 genes involved in the late biosynthesis of ergosterol including *ERG11*  
40 and *ERG3*. Importantly, chromatin immunoprecipitation analysis showed that histone  
41 H3K4 trimethylation was detected on chromatin of actively transcribed *ERG* genes.  
42 Furthermore, H3K4 trimethylation increased upon azole-induced gene expression which  
43 was also found to be dependent on the catalytic activity of Set1. Altogether, our findings  
44 show that Set1-mediated histone H3K4 methylation governs the intrinsic drug resistant  
45 status in *C. glabrata* via epigenetic control of azole-induced *ERG* gene expression.

46

47

48

49 **IMPORTANCE**

50 *C. glabrata* is the second most commonly isolated species from *Candida* infections,  
51 coming in second to *C. albicans*. Treatment of *C. glabrata* infections are difficult due to  
52 their natural resistance to antifungal azole drugs and their ability to adapt and become  
53 multidrug resistant. In this study, we investigated the contributing cellular factors for  
54 controlling drug resistance. We have determined that an epigenetic mechanism governs  
55 the expression of genes involved in the late ergosterol biosynthesis pathway, an  
56 essential pathway that antifungal drugs target. This epigenetic mechanism involves  
57 histone H3K4 methylation catalyzed by the Set1 methyltransferase complex  
58 (COMPASS). We also show that Set1-mediated histone H3K4 methylation is needed for  
59 expression of specific azole induced genes and azole drug resistance in *C. glabrata*.  
60 Identifying epigenetic mechanisms contributing to drug resistance and pathogenesis  
61 could provide alternative targets for treating patients with fungal infections.

62

63

64

65

66

67

68

## 69 INTRODUCTION

70 *Candida* infections are a major health concern due to the increased frequency of  
71 infections and the development of drug resistance (1, 2). Over the years, *Candida*  
72 *glabrata* has become the second most common cause of candidiasis (1-3). In some  
73 immunocompromised patients, such as diabetics, patients with hematologic cancer,  
74 organ transplant recipients, and the elderly, it is the most predominate *Candida* infection  
75 (2-6). The emergence of *C. glabrata* as a major pathogen is likely due to its intrinsic  
76 drug resistance to azole antifungal drugs and ability to quickly adapt and acquire clinical  
77 drug resistance during treatment (3, 7). The consequence of drug resistance leads to  
78 increases in healthcare costs as well as lower success rates in treatment and an  
79 increase in mortality (8-10).

80 *C. glabrata* naturally has low susceptibility to azole drugs and because of this  
81 attribute, echinocandins are the preferred drug choice for treating *C. glabrata* infections  
82 (11). *C. glabrata* can also acquire clinical resistance to azole drugs which is often due to  
83 overexpressing the ABC-transporter drug efflux pump Cdr1 or Pdh1 (Cdr2) caused by  
84 gain of function mutations in the transcription factor Pdr1 (7, 12-14). In other *Candida*  
85 species, acquired clinical azole resistance can also be due to overexpression of *ERG11*  
86 due to gain of function mutations in the Upc2 transcription factor or mutations in *ERG11*  
87 (15-17). However, for unbeknownst reasons, *ERG11* or *UPC2* mutations are typically  
88 not found in clinically drug resistant *C. glabrata* strains (7, 18-20).

89 Because pathogenic fungi can rapidly adapt to various cellular environments and  
90 xenobiotic drug exposures, epigenetic mechanisms are also likely contributing to altered  
91 gene expression profiles permissive for adaptation and drug resistance. Several studies

92 in *C. albicans* support this hypothesis and show that epigenetic factors such as histone  
93 acetyltransferases, *CaGcn5* and *CaRtt109*, and histone deacetylases, *CaRpd3* and  
94 *CaHda1* are important for either fungal pathogenesis and/or drug resistance (21-25). In  
95 contrast, epigenetic factors that post-translationally modify histones have not been  
96 extensively studied for their roles in drug resistance in *C. glabrata*. Nonetheless, Orta-  
97 Zavalz et al., have shown that deleting histone deacetylase, *CgHST1* decreases  
98 susceptibility to fluconazole which is likely attributed to an increase in transcript levels of  
99 *CgPDR1* and *CgCDR1* under untreated conditions (26). In addition, a recent publication  
100 by Filler et al., has indicated that *C. glabrata* strains that are deleted for *GCN5*, *RPD3*,  
101 or *SPP1* have increased susceptibility to caspofungin when using high concentrations  
102 (27). However, no mechanistic understanding such as gene targets or changes in  
103 chromatin/histone modifications was provided for the caspofungin hypersensitive  
104 phenotype.

105 Previous publications from our lab demonstrated that in *S. cerevisiae* loss of  
106 *Set1*, a known histone H3K4 methyltransferase, has a hypersensitive growth defect in  
107 the presence of the antifungal metabolite, brefeldin A (BFA) and clinically used azole  
108 drugs (28, 29). We determined that hypersensitivity to BFA was due to a decrease in  
109 ergosterol levels in *S. cerevisiae* strains lacking histone H3K4 methylation. However,  
110 until this study, no mechanistic understanding has been provided why a strain lacking  
111 *SET1* alters azole drug susceptibility. Furthermore, in *C. albicans*, loss of *SET1* appears  
112 to alter virulence but not azole drug resistance (30). To determine if an increase in azole  
113 susceptibility is conserved in a human fungal pathogen closely related to *S. cerevisiae*,

114 we investigated the role of Set1 and its mechanistic contribution to drug resistance in *C.*  
115 *glabrata*.

116 In this study, we show for the first time that Set1-mediates histone H3K4 mono-,  
117 di-, and trimethylation in *C. glabrata* and loss of Set1-mediated histone H3K4  
118 methylation alters the azole drug susceptibility of *C. glabrata* similar to what is seen in  
119 *S. cerevisiae*. This increase in susceptibility to azole drugs in *C. glabrata* strains lacking  
120 Set1-mediated histone H3K4 methylation is not a consequence of altered expression  
121 levels of *CDR1*, *PDR1* or their ability to efflux drugs. Interestingly, RNA-sequencing  
122 (RNA-seq) revealed that Set1 is required for azole-induced expression of *ERG* genes,  
123 including *ERG11* and *ERG3*. This azole-induced gene expression was dependent on  
124 Set1 methyltransferase activity and associated with gene-specific increases in histone  
125 H3K4 trimethylation on *ERG11* and *ERG3* chromatin. Overall, we have provided a  
126 mechanistic understanding of why Set1 mediated histone H3K4 methylation governs the  
127 intrinsic drug resistant status in *C. glabrata*. Identifying and understanding the  
128 epigenetic mechanisms contributing to drug resistance will be important for the  
129 development of alternative drug targets for treating patients with fungal infections.  
130

131 **RESULTS**

132 **Loss of Set1-mediated histone H3K4 methylation in *S. cerevisiae* and *C. glabrata***

133 **alters azole drug efficacy.** Set1 is a known SET domain-containing lysine histone  
134 methyltransferase that is conserved from yeast to humans and the enzymatic activity of  
135 the SET domain catalyzes mono-, di-, and trimethylation on histone H3 at Lysine 4  
136 (Lys4) (31, 32). Our previous work in *Saccharomyces cerevisiae* (*S. cerevisiae*) has  
137 determined that loss of *SET1* in the BY4741 background strain results in increased  
138 susceptibility to azole drugs suggesting that H3K4 methylation is necessary for  
139 mediating wild-type azole drug resistance. To determine the role of histone H3K4  
140 methylation in azole drug efficacy, we constructed histone H3K4R mutations in the  
141 BY4741 background strain. Because *S. cerevisiae* has two genes encoding histone H3,  
142 two yeast strains were constructed where a histone H3K4R mutation was integrated at  
143 one histone H3 gene keeping the other gene wild-type (ScH3K4R-1) while the other  
144 strain contained H3K4R mutations integrated at both histone H3 genes (ScH3K4R-2,  
145 see supplemental table S1). To determine if loss of histone H3K4 methylation altered  
146 azole drug sensitivity similar to a *set1* $\Delta$  (*Scset1* $\Delta$ ) strain, a serial-dilution spot assay  
147 was performed. Both *Scset1* $\Delta$  and ScH3K4R mutant strains were grown in synthetic  
148 complete minimal media and spotted on SC agar plates with and without 8  $\mu$ g/mL  
149 fluconazole (Fig. 1A). These data show that loss of histone H3 methylation by deleting  
150 Sc*SET1* or mutating histone H3 where both histone H3 genes are mutated at K4  
151 (ScH3K4R-2), resulted in similar azole drug hypersensitivity when compared to each  
152 other (Fig. 1A). To confirm that histone H3K4 methylation was abolished in these  
153 strains, western blot analysis was performed using methyl-specific antibodies to detect

154 histone H3K4 mono-, di-, and trimethylation (Fig. 1B). Histone H3 was used for a  
155 loading control (Fig. 1B). As expected, histone methylation was abolished in *set1Δ* and  
156 in H3K4R-2 mutation strains but not in the histone H3K4R-1 strain (Fig. 1B). Together  
157 our data demonstrate that the presence of Histone H3K4 methylation is critical for  
158 maintaining wild-type azole drug susceptibility.

159 To determine if an azole hypersensitive growth phenotype observed in *S.*  
160 *cerevisiae* is also conserved in the human fungal pathogen *C. glabrata*, WT (*CgWT*)  
161 and a *set1Δ* (*Cgset1Δ*) strain were spotted on SC agar plates with and without 16 μg/mL  
162 fluconazole (Fig. 1C). Similar to what was observed in *S. cerevisiae*, deleting *SET1* in  
163 *C. glabrata* 2001 (CBS138, ATCC2001) showed an increase in azole susceptibility  
164 when compared to a *CgWT* strain (Fig. 1C). Additionally, the *Cgset1Δ* strain had a  
165 significant growth delay in liquid growth cultures compared to *CgWT* when treated with  
166 32 μg/mL fluconazole (Fig. 1E). Western blot analysis showed that deleting *CgSET1*  
167 abolished all histone H3K4 mono-, di-, and trimethylation confirming that *CgSET1* is the  
168 sole histone H3K4 methyltransferase in *C. glabrata* (Fig. 1D). Altogether, our results  
169 show Set1-mediated histone H3K4 methylation in *S. cerevisiae* and *C. glabrata* is  
170 conserved and is necessary for maintaining a wild-type resistance to azole drugs.

171 **Loss of *C. glabrata* Set1 complex members alters azole efficacy and histone H3K4**  
172 **methylation.** In *S. cerevisiae*, Set1 forms a complex referred to as the Complex  
173 Proteins Associated with Set1 or COMPASS. COMPASS forms a stable complex with 8  
174 proteins which includes the catalytic subunit Set1, Swd1, Swd2, Swd3, Spp1, Bre2,  
175 Sdc1, and Shg1 (33-35). Previous studies in *S. cerevisiae* have determined that Swd1,  
176 Swd2, Swd3, Spp1, Bre2, and Sdc1 are necessary for Set1 to properly catalyze the



177 various states of histone H3K4 mono-, di, and trimethylation (33-38) . To determine if  
178 COMPASS components are required to govern azole drug efficacy and Set1-mediated  
179 histone H3K4 methylation in *C. glabrata*, we generated deletion strains lacking *SET1*,  
180 *SPP1*, *BRE2* and *SWD1* and determined their MIC in RPMI media (Fig. 2A). Consistent  
181 with our agar and liquid growth assays in Figure 1, the *Cgset1Δ* strain showed  
182 increased susceptibility to fluconazole with an 8-fold difference in MIC compared to the  
183 *CgWT* strain (Fig. 2A). A *Cgswd1Δ* strain showed a similar MIC as the *Cgset1Δ* strain  
184 while the MIC of *Cgspp1Δ* and *Cgbre2Δ* deletion strains were 4-fold different than the  
185 WT strain (Fig 2A). Furthermore, all *C. glabrata* COMPASS deletions strains showed an  
186 increase in susceptibility to azole drugs on agar plates similar to *S. cerevisiae*  
187 COMPASS deletion strains except for the *Scspp1Δ* which is likely due to differences in  
188 the histone H3K4 methylation status (Fig. 2B, 2C, S1A, and (29, 33, 34, 36, 38).

189 Western blot analysis determined that *Cgswd1Δ* strain lacked all forms of histone  
190 H3K4 methylation (Fig. 2C) which is also observed in *Cgset1Δ* and *Scset1Δ* strains  
191 (Fig. 2C and 1D). In contrast, deletion of *CgSPP1* and *CgBRE2* abolished all detectable  
192 levels of H3K4 trimethylation and significantly reduced the levels of histone H3K4 mono-  
193 and dimethylation. Taken together, our data show that when *C. glabrata* COMPASS  
194 subunits *SET1* and *SWD1* are deleted, global loss of histone H3K4 methylation is  
195 observed similar to what is seen when the subunits are deleted in *S. cerevisiae* (Fig 2C  
196 and (33, 34, 36, 38). However, the *Cgspp1Δ* has a total loss of histone H3K4  
197 trimethylation and significant loss of histone H3K4 mono- and dimethylation similar to the  
198 *Cgbre2Δ* and *Scbre2Δ* strains (Fig 2C). For unknown reasons, the pattern of histone  
199 H3K4 methylation is different in the *Scspp1Δ* strain which only has a reduction in

200 histone H3K4 trimethylation but not mono- or dimethylation (33-39). Altogether, these  
201 results suggest that the COMPASS complex is needed to mediate proper histone H3K4  
202 methylation and WT resistance to azole drugs.

203 **The methyltransferase activity of Set1 governs azole drug efficacy in *C. glabrata*.**

204 To confirm that altered azole efficacy in the *Cgset1Δ* strain was due to loss of *SET1* and  
205 not a secondary mutation, a genomic fragment containing the *CgSET1* promoter,  
206 5'UTR, open reading frame, and 3'UTR was amplified by PCR and cloned into the *C.*  
207 *glabrata* plasmid, pGRB2.0 (40). Because a H1017K mutation in the SET domain of *S.*  
208 *cerevisiae* Set1 is known to be catalytically inactive (28, 41, 42), we performed site-  
209 directed mutagenesis on pGRB2.0-*CgSET1* and generated an analogous mutation in *C.*  
210 *glabrata* Set1 at H1048K determined using the sequence alignment in Fig. 3A.

211 Additionally, we deleted *SET1* in *C. glabrata* 2001HTU (ATCC200989) to utilize the *ura3*  
212 auxotrophic marker (43). Importantly, *Cg2001HTU* lacking *SET1* was hypersensitive to  
213 azole drugs similar to when *SET1* was deleted in *Cg2001* (Fig. 1C and 3B).

214 Furthermore, transformation of pGRB2.0-*CgSET1* into the *Cg2001HTU/set1Δ* strain  
215 was able to rescue azole hypersensitivity while pGRB2.0-*Cgset1H1048K* did not rescue  
216 wild-type azole drug resistance as shown by serial dilution spot assays grown on SC  
217 agar plates with 32 μg/mL fluconazole (Fig. 3B). MIC assays under SC-ura conditions  
218 also show similar results (see Supplemental Fig. S1B). Western blot analysis indicated  
219 that pGRB2.0-*CgSET1* expression in *Cg2001HTU/set1Δ* strain restored histone H3K4  
220 methylation to wild-type levels while *Cgset1H1048K* did not rescue histone H3K4  
221 methylation confirming that this mutation lacks catalytic activity similar to *Scset1H1017K*  
222 (Fig. 3C). Importantly, quantitative real-time PCR analysis (qRT-PCR) confirmed that

223 the plasmids expressing *CgSET1* and *Cgset1H1048K* were similar to the endogenously  
224 expressed *SET1* (Fig. S1C). This shows that loss of histone H3K4 methylation was not  
225 due to difference in expression levels but due to the catalytic inactivation of  
226 *Cgset1H1048K*. These data suggest that altered azole drug efficacy in *Cgset1Δ* strains  
227 are specifically due to the loss of *SET1* and its catalytic activity.

228 **Drug efflux pump expression and function is not altered in a *C. glabrata set1Δ***  
229 **strain.** In *Candida glabrata*, the major mechanisms for changes in drug resistance are  
230 due to changes in expression of *CDR1*, the main drug efflux pump, or gain-of-function  
231 mutations in *PDR1*, a gene that encodes the transcription factor for *CDR1* (7, 12, 19,  
232 20, 44). To determine if altered drug resistance in *Cgset1Δ* cells was due to changes in  
233 *CDR1* or *PDR1* expression, we analyzed the transcript levels of *CDR1* and *PDR1* via  
234 qRT-PCR (Fig. 4A and B). We observed that *Cgset1Δ* cells grown with and without  
235 azoles do not significantly affect transcript levels of *CDR1* or *PDR1* when compared to a  
236 wild-type strain (Fig. 4A and B). Additionally, we analyzed the transcript levels of  
237 transporters *SNQ2*, *YOR1*, and *PDH1*. We did not see any significant changes in *SNQ2*  
238 or *YOR1*, but we did see a decrease in *PDH1* transcripts in a *set1Δ* strain upon azole  
239 treatment (Fig. S2). However, previous studies have shown loss of *PDH1* alone is not  
240 sufficient to lead to azole sensitivity (45). To determine if drug efflux was functional in  
241 *Cgset1Δ* cells, a Nile Red fluorescence-based assay was performed. Nile Red, a  
242 fluorescent lipophilic stain, has been shown to be a substrate for the ABC transporter  
243 Cdr1 in *C. albicans* and *C. glabrata* (46, 47). As a control, we also generated a *Cgpdr1Δ*  
244 strain, a deletion strain known to disrupt the expression of *CDR1* and subsequently  
245 prevent drug or Nile Red efflux (15). The Nile Red assay showed that *Cgset1Δ* cells had

246 similar levels of Nile Red as wild-type cells but less Nile Red than *Cgpd1Δ* cells (Fig.  
247 4C). To induce *CDR1* expression levels, *Cgset1Δ* and wild-type cells were treated with  
248 fluconazole. Although azole treatment did reduce the amount of Nile Red in *Cgset1Δ*  
249 and wild-type cells compared to untreated cells, there was no discernable differences  
250 observed between *Cgset1Δ* and wild-type cells for their ability to efflux Nile Red, (Fig.  
251 4C). Altogether these data suggest that cells lacking *SET1* have similar efflux  
252 capabilities as wild-type cells in the presence or absence of azole treatment. This  
253 suggests that the increase in azole sensitivity seen in a *Cgset1Δ* strain is not due to  
254 malfunction of *Cdr1* expression or its efflux capabilities.

255 **Loss of *Set1* leads to decreased expression of genes involved in the sterol**  
256 **biosynthesis pathway when treated with fluconazole.** Because drug efflux function  
257 or transcript levels was not disrupted in a *Cgset1Δ* strain, we used RNA-sequencing  
258 analysis to provide insight into what gene pathway might be disrupted in the *Cgset1Δ*  
259 strain and explain why a loss of *SET1* alters azole drug efficacy. *CgWT* and *Cgset1Δ*  
260 strains were treated with 64 µg/mL fluconazole for three hours in SC complete media  
261 and RNA was extracted for RNA-sequencing. Principle component analysis (PCA) and  
262 differentially expressed genes (DEG) analysis demonstrated by the volcano scatter plot  
263 ( $-\log_2$  false discovery rate (FDR), y-axis) versus the fold change (x-axis) of the DEGs)  
264 indicate that the untreated and treated *CgWT* strain is substantially and statistically  
265 different from the untreated and treated *Cgset1Δ* (Fig 5). DESeq2 analysis was used to  
266 identify the differentially expressed genes (DEGs) under fluconazole treatment using an  
267 FDR of 0.05. From this analysis, a total of 2389 genes were differentially expressed in  
268 *Cgset1Δ* vs. *CgWT* under untreated condition (Fig. 5B). Whereas, 1508 genes were

269 differentially expressed under treated conditions, where we observed 800 (14.2%)  
270 genes that were upregulated and 708 (12.6%) genes that were downregulated out of  
271 5615 genes in *Cgset1Δ* compared to *CgWT* (Fig. 5C and supplemental data). After  
272 applying a 1.4-fold cutoff to the data, we observed 1,644 genes differentially expressed  
273 in the untreated *Cgset1Δ* vs. *CgWT* strains. In the treated strains, with a 1.4-fold cutoff,  
274 we observed 543 (9.7%) genes were down in a *Cgset1Δ* vs *CgWT* and 626 (11.1%)  
275 genes were up. These data show that *SET1* is important for maintaining proper gene  
276 expression in *C. glabrata*.

277         Because Set1-mediated histone H3K4 methylation is known to play a key role in  
278 gene activation, we focused our attention on genes downregulated in *Cgset1Δ*  
279 compared to *CgWT*. For azole-treated strains. GO Term Finder of the gene sets that  
280 were downregulated found significant GO terms involved in lipid, steroid and  
281 sterol/ergosterol metabolism or biosynthesis (Fig. 5D). For untreated strains, GO Term  
282 Finder identified significant GO terms involved in lipid metabolism but not steroid and  
283 sterol/ergosterol metabolism or biosynthesis (supplemental table S6). Interestingly, our  
284 data showed that 12 of the 12 genes involved in the late ergosterol biosynthesis  
285 pathway are down 1.4-fold or more in a *Cgset1Δ* compared to *CgWT* under azole  
286 treated conditions (Fig. 5C, S4A & B and supplemental table S7). Whereas, 5 of the 12  
287 late pathway *ERG* enzyme encoding genes were down in a *Cgset1Δ* compared to  
288 *CgWT* under untreated conditions using a 1.4-fold difference in gene expression as a  
289 cutoff (Fig. 5D. and Supplemental table S7). Two of these differentially expressed genes  
290 *ERG11*, the gene that encodes the target of azoles, and *ERG3*, the gene that encodes  
291 the enzyme responsible for production of a toxic sterol when cells are treated with

292 azoles, are known to play roles in azole drug resistance in various *Candida* species (17,  
293 19, 48-50). To validate results seen in RNA-sequencing analysis, *ERG11* and *ERG3*  
294 transcript levels were analyzed by qRT-PCR. Our analysis showed that upon azole  
295 treatment, *ERG3* and *ERG11* transcript levels are induced in a WT strain (Fig. 5C and  
296 D) while loss of *SET1* prevented WT induction of both *ERG11* and *ERG3* under azole  
297 conditions. Even though our untreated RNA sequencing data set did show minor  
298 changes in *ERG3* and *ERG11* transcript levels, we did not detect any significant  
299 changes between *Cgset1Δ* and *CgWT* cells when grown under untreated standard log-  
300 phase conditions using qRT-PCR analysis (Fig. 5E and F). We also performed gene  
301 expression analysis to determine if *ERG* gene transcript induction still depended on  
302 Set1 in saturated cultures. We show in both exponential and saturated cultures Set1 is  
303 necessary for *ERG3* and *ERG11* induction upon azole treatment in *C. glabrata* (Fig.  
304 5E&F and S3A&B). Because *ERG3* transcript levels were decreased, we do not  
305 anticipate azole sensitivity is due to an increase in toxic sterols but by the lack of  
306 induction of *ERG11* and other *ERG* genes resulting in lower total cellular ergosterol  
307 levels (51, 52).

308 **Set1-mediated histone H3K4 methylation is enriched on *ERG* gene**  
309 **chromatin and is required for azole induction of *ERG* genes.** Because histone  
310 H3K4 trimethylation is associated with gene induction, we wanted to determine if Set1  
311 was directly catalyzing histone H3K4 methylation on chromatin at *ERG* loci. To  
312 determine if histone H3K4 trimethylation was present at *ERG11* and *ERG3* chromatin,  
313 chromatin immunoprecipitation (ChIP) analysis was performed using histone H3K4  
314 trimethyl-specific antibodies. As expected, histone H3K4 trimethylation is highly

315 enriched at the 5'-ends of the open reading frame of *ERG11* and *ERG3* in untreated  
316 conditions and further enriched upon azole treatment corresponding to increased  
317 transcript levels of *ERG11* and *ERG3* in both exponential and saturated cell cultures  
318 (Fig. 6A & B and S3D & E).

319 To confirm that this was due to the methyltransferase activity of Set1, we  
320 performed qRT-PCR transcript analysis using the *Cg2001HTUset1Δ* strain expressing  
321 pGRB2.0 only, pGRB2.0-*CgSET1*, and pGRB2.0-*Cgset1H1048K*. *Cg2001HTU*  
322 expressing pGRB2.0 only was used as our WT control. As shown in Figure 6C and D,  
323 pGRB2.0-*CgSET1* was able to induce *ERG11* and *ERG3* similar to WT cells under  
324 azole treatment indicating that *SET1* expression could rescue the *ERG* gene expression  
325 in the *Cg2001HTUset1Δ* strain. This rescue of *ERG* gene expression was dependent on  
326 the catalytic activity of Set1 since expression of pGRB2.0-*Cgset1H1048K* did not  
327 restore *ERG* gene expression under azole treatment. Additionally, it looked similar to  
328 the *Cg2001HTUset1Δ* strain expressing pGRB2.0 indicating that the catalytic activity of  
329 Set1 is required for azole gene induction. Altogether, these data show that Set1-  
330 mediated histone H3K4 methylation directly targets the chromatin of *ERG* genes, and  
331 this epigenetic modification is required for azole induction of *ERG* genes. Based on our  
332 results, the lack of Set1 or histone H3K4 methylation on *ERG11* chromatin prevents the  
333 transcriptional response for inducing *ERG* genes which consequently disrupts  
334 ergosterol homeostasis, thus making the *Cgset1Δ* strains more susceptible to azole  
335 drugs.

336

337



## 338 DISCUSSION

339 In this study, we established that loss of Set1-mediated histone H3K4  
340 methylation alters azole drug susceptibility in *S. cerevisiae* and *C. glabrata*. This  
341 increase in susceptibility to azole drugs in a *Cgset1Δ* strain was not because of the  
342 typical changes in *CDR1* and *PDR1* expression levels or their ability to efflux drugs.  
343 However, we observed that strains lacking histone H3K4 methylation failed to induce  
344 *ERG* genes. This azole-induced gene expression was dependent on Set1  
345 methyltransferase activity and correlated with gene-specific increases in histone H3K4  
346 trimethylation on chromatin at *ERG* genes (see model, Fig. 7). Overall, we have  
347 provided an epigenetic mechanism upon azole treatment that is dependent on histone  
348 H3K4 methylation governing ergosterol homeostasis. Identifying and understanding this  
349 Set1-*ERG* pathway and other epigenetic mechanisms contributing to altered drug  
350 susceptibility will be important for the development of alternative drug targets that could  
351 be used in combinatorial therapy for treating patients with drug resistant fungal  
352 infections.

353 Set1 is the catalytic subunit of a multi-subunit protein complex called COMPASS  
354 that mono-, di-, and trimethylates histone H3K4. In this study, we show that *C. glabrata*  
355 Set1 is the sole histone H3K4 methyltransferase under log-phase growth conditions  
356 since deletion of *SET1* abolishes all forms of histone H3K4 methylation similar to what  
357 is seen in *S. cerevisiae* and *C. albicans*. Deletion of the genes encoding *C. glabrata*  
358 COMPASS complex subunits Swd1 and Bre2 have similar loss of histone H3K4  
359 methylation as their *S. cerevisiae* counterparts (see Fig 2C and (33, 34, 36, 38)).  
360 However, deleting *SPP1* in *C. glabrata* abolishes all histone H3K4 trimethylation and



361 significantly reduces the levels of histone H3K4 mono- and dimethylation which is in  
362 contrast to what is found in a *Scspp1Δ* strain where only histone H3K4 trimethylation is  
363 disrupted but retains WT levels of mono- and dimethylation (33, 34, 36, 38). We  
364 speculate that this difference in histone H3K4 methylation pattern is due to how *CgSpp1*  
365 assembles with the COMPASS complex allowing *CgSpp1* to have a greater impact on  
366 the overall catalytic activity of COMPASS. Interestingly, this pattern of methylation  
367 appears to correlate with sensitivity to azole drugs (compare Fig. 2B with supplemental  
368 Fig. S1A) where *Scspp1Δ* grows more similar to a WT strain than *Cgspp1Δ* when grown  
369 on azole containing plates.

370 Our published observation and current data show that loss of *SET1* alters ergosterol  
371 homeostasis and azole susceptibility in *S. cerevisiae* and *C. glabrata* (28, 29).  
372 Specifically, loss of *SET1* in *S. cerevisiae* altered expression of genes involved in  
373 ergosterol biosynthesis under untreated conditions (28). In contrast, in *C. glabrata*,  
374 significant changes in *ERG* gene expression were only observed under azole treated  
375 conditions but not untreated conditions suggesting that histone H3K4 methylation is  
376 needed for azole induced gene induction and not basal level expression (Fig. 5E and F).  
377 Although regulation of ergosterol biosynthesis has been shown to be coupled to  
378 expression of ABC transport genes such as *CDR1* and its transcription factor Pdr1 (53,  
379 54), compensatory changes in *CDR1* and *PDR1* expression levels was not observed in  
380 a *cgset1Δ* strain when treated with azole drugs (Fig. 4A and 4B). More investigation will  
381 be needed to understand how *CDR1* and/or *PDR1* are epigenetically regulated in *C.*  
382 *glabrata* (26, 55).

383 In *C. albicans*, Raman et al., reported that loss of *SET1* in did not alter azole  
384 sensitivity but did decrease virulence in mice (30). Furthermore, *C. albicans* is naturally  
385 more susceptible to azole drugs than *S. cerevisiae* and *C. glabrata*. We suspect the  
386 difference observed in these organisms in azole sensitivity and gene regulation is likely  
387 due to their differences in sterol uptake. For example, *C. glabrata* and *S. cerevisiae* can  
388 uptake sterols under a variety of conditions where *C. albicans* does not (56).  
389 Interestingly, loss of *SET1* in *S. cerevisiae* can also permit sterol uptake under aerobic  
390 conditions since sterol transporter transcripts of *PDR11* and *AUS1* are increased in a  
391 *Scset1Δ* strain (28). In contrast, *AUS1*, is constitutively expressed in *C. glabrata* under  
392 aerobic and anaerobic conditions allowing sterol uptake. Even though *AUS1* is  
393 constitutively expressed, we do observe a slight increase in *AUS1* transcript levels in a  
394 *Cgset1Δ* relative to *CgWT* under untreated conditions but not treated conditions (see  
395 supplemental data Fig. S3C). Alternatively, loss of *SET1* may not alter azole efficacy in  
396 *C. albicans* because it does not regulate the expression of *ERG* genes or sterol  
397 transporters. However, other epigenetic factors as indicated below are likely playing a  
398 role in *C. albicans*. Nonetheless, additional studies will be needed to determine the  
399 precise mechanistic cause of these distinct differences.

400 Overall, our data suggest that histone H3K4 methylation is an epigenetic  
401 mechanism to help induce *ERG* gene expression when *C. glabrata* strains are exposed  
402 to azole drugs. We propose histone H3K4 methylation and possibly other epigenetic  
403 marks are contributing factors to *C. glabrata*'s natural resistance to azole drugs.  
404 Interestingly, several histone deacetylases (HDACs) have been implemented in azole  
405 resistance in *C. albicans* such as *CaHda1*, *CaRpd3*, and *CaHos2* (22, 23, 57-59).

406 Additionally, HDAC inhibitors have been shown to have a synergistic effect on cells  
407 when combined with azoles and echinocandins (57, 58, 60, 61). Interestingly, the  
408 treatment of *C. albicans* with trichostatin A (TSA) lacks the trailing effect observed in  
409 MIC assays when using azole drugs and the lack of trailing effect was attributed to  
410 reduced *CDR* and *ERG* gene expression (58, 62). In a similar manner, *Cgset1Δ* also  
411 lacks a trailing effect in our MIC assays (personal observation) which we suspect is  
412 specifically due to the lack of azole-induced *ERG* gene expression since *CDR1*  
413 expression was not altered (Fig. 4A and 5). Furthermore, treatment of drug resistant  
414 fungal pathogens including various isolates of *C. glabrata* with a Hos2 inhibitor  
415 MGCD290 showed synergy with azole drugs which converted the MICs of azole  
416 treatment from resistant to susceptible (60). Since Hos2 is known to be a key  
417 component of the Set3 complex and the Set3 complex is recruited to chromatin via  
418 Set1-mediated histone H3K4 methylation (63, 64), it is likely MGCD290 is mediating its  
419 effect with azoles through inhibiting azole-induced *ERG* gene expression.

420 We expect that the Set1-*ERG* regulatory pathway controlling ergosterol  
421 homeostasis will not only impact drug resistance but will also impact fungal  
422 pathogenesis. For example, *C. albicans* strains lacking *ERG11* or *ERG3* produces  
423 avirulent hyphae, decreases the adherence to epithelial cells, and reduces virulence of  
424 *C. albicans* in oral mucosal infections and disseminated candidiasis (65-67). Similarly,  
425 deletion of *SET1* in *C. albicans* also forms hyphae, decreases epithelial adherence, and  
426 reduces virulence of *C. albicans* in disseminated candidiasis (30). Based on our current  
427 data in *C. glabrata*, we speculate that loss of *SET1* in *C. albicans* reduces expression of  
428 *ERG* genes and ergosterol production which in turn reduces epithelial adherence and

429 thus alters the virulence of *C. albicans*. Therefore, the loss of *SET1* could also alter the  
430 virulence of *C. glabrata*. Interestingly, several genes encoding cell wall proteins and  
431 adhesion factors are also down regulated in a *Cgset1Δ* strain as determined by RNA-  
432 sequencing. However, future studies will be needed to determine if this Set1-*ERG*  
433 regulatory pathway exists for *C. albicans* and if *SET1* is controlling virulence factors for  
434 *C. glabrata*.

435 Overall, the occurrence of multidrug resistant strains is increasing across all  
436 *Candida* species. In addition, with the development and identification of multidrug  
437 resistant fungal species such as *C. auris*, a pathogen of urgent concern for the CDC, it  
438 is imperative to find alternative treatment options. Our study along with others provide  
439 compelling evidence that epigenetic modifiers are playing key roles in fungal  
440 pathogenesis and drug resistance. Understanding these epigenetic events and the  
441 pathways they impact are needed to develop new drug therapies so that current and  
442 newly emerging multidrug resistant fungal pathogens can be effectively treated.

## 443 **MATERIALS AND METHODS**

### 444 **Plasmids and yeast strains**

445 All plasmids and yeast strains are described in Table S1 and S2. *C. glabrata* 2001  
446 (CBS138, ATCC2001) and *C. glabrata* 2001HTU (ATCC200989) were purchased from  
447 ATCC (43). A genomic fragment containing the *CgSET1* promoter, 5'UTR, open reading  
448 frame, and 3'UTR was amplified by PCR and cloned into the pGRB2.0 plasmid. The  
449 pGRB2.0 plasmid was purchased from Addgene. Standard, site-directed mutagenesis  
450 was used to generate *Cgset1H1048K*. *Candida glabrata* *SET1*, *BRE2*, *SWD1*, *SPP1*,  
451 and *PDR1* genes were deleted via standard homologous recombination. Briefly, drug

452 resistant selection markers were PCR amplified with Ultramer DNA Oligos (IDT) using  
453 pAG32-HPHMX6 (hygromycin) or pAG25-NATMX6 (nourseothricin).

#### 454 **Serial dilution spot and liquid growth assays**

455 For serial dilution spot assays, yeast strains were inoculated in SC media and grown to  
456 saturation overnight. Yeast strains were diluted to an OD<sub>600</sub> of 0.1 and grown in SC  
457 media to log phase shaking at 30°. The indicated strains were spotted in five-fold  
458 dilutions starting at an OD<sub>600</sub> of 0.01 on untreated SC plates or plates containing 16,32,  
459 or 64 µg/ml fluconazole (Sigma-Aldrich, St. Louis, MO). Plates were grown at 30° for 1-3  
460 days. For growth assays, the indicated yeast strains were inoculated in SC media and  
461 grown to saturation overnight. Yeast strains were diluted to an OD<sub>600</sub> of 0.1 and grown  
462 in SC media to log phase shaking at 30°. The indicated strains were diluted to an OD<sub>600</sub>  
463 of 0.0001 in 100 µl SC media. Cells were left untreated or treated with 64 µg/ml  
464 fluconazole and grown for 50 hrs shaking at 30°. The cell density OD<sub>600</sub> was determined  
465 every 1 hr using the Bio-Tek Synergy 4 multimode plate reader.

#### 466 **Cell extract and Western blot analysis**

467 Whole cell extraction and western blot analysis to detect histone modifications were  
468 performed as previously described (36, 68). The histone H3K4 methylation-specific  
469 antibodies were used as previously described; H3K4me1 (Upstate 07-436, 1:2,500),  
470 H3K4me2 (Upstate 07-030, 1:10,000), H3K4me3 (Active motif 39159, 1:100,000) (28,  
471 69). Histone H3 antibodies were used as our loading control (Abcam ab1791, 1:10,000).

#### 472 **RNA-sequencing analysis**

473 The CBS138 *Cg2001* WT and *set1Δ* strains were inoculated in SC media and grown to  
474 saturation overnight. Cells were diluted to an OD<sub>600</sub> of 0.1 and recovered to log phase

475 for 3 hours shaking at 30°. Prior to treatment, cells were collected for the untreated  
476 sample and zero time point. Cultures were treated at an OD<sub>600</sub> of 0.2 with 64 µg/ml  
477 fluconazole (Sigma-Aldrich, St. Louis, MO) dissolved in DMSO as previously described  
478 (70). Cells were collected after 3 hours. Total RNA of three biological replicates for each  
479 condition and sample were isolated by standard acid phenol purification, treated with  
480 DNase (Ambion), and total RNA was purified using standard acid phenol purification.  
481 The quality of the RNA was tested using an Agilent Bioanalyzer 2100 using the High  
482 Sensitivity DNA Chip. The complementary DNA library was prepared by the Purdue  
483 Genomics Facility using the TruSeq Stranded Kit with poly(A) selection (Illumina)  
484 according to the manufacturer's instructions. The software Trimmomatic v.0.39 was  
485 used to trim reads, removing adapters and low quality bases (71). STAR  
486 v.2.5.4b was used to align reads to the *C. glabrata* CBS 138 reference genome,  
487 version s02-m07-r23 (72). One mismatch was allowed per read. HTSeq v.0.6.1  
488 was used to generate the gene count matrix on "intersection-nonempty" mode  
489 (73). R version 3.5.1 and Bioconductor release 3.6 were used to perform all  
490 statistical analyses on the RNA-seq data. The intersection of genes identified  
491 as statistically significantly differentially expressed with a Benjamini-Hochberg  
492 corrected false discovery rate of less than 5% by DESeq2 v.1.18.0 was used in  
493 downstream analyses (74, 75).

#### 494 **Quantitative real-time PCR analysis**

495 RNA was isolated from cells by standard acid phenol purification. Reverse transcription  
496 was performed using the ABM all-in-one 5X RT Mastermix kit (ABM, Richmond,  
497 Canada). Primer Express 3.0 software was used for designing primers and quantitative

498 real-time polymerase chain reaction (qRT-PCR) was performed as previously described  
499 (28, 76, 77). A minimum of three biological replicates, including three technical  
500 replicates, were performed for all samples. Data were analyzed using the  $\Delta\Delta C_t$  method  
501 where *RDN18* (18S ribosomal RNA) was used as an internal control. All samples were  
502 normalized to an untreated, untagged WT strain.

### 503 **Minimal inhibitory concentration assay**

504 MIC assays were performed based on a modified version of the CLSI method for testing  
505 yeast, 3<sup>rd</sup> edition (78). Briefly, yeast strains were inoculated in SC media and grown to  
506 saturation overnight. The indicated strains were diluted to an OD<sub>600</sub> of 0.003 in SC or  
507 RPMI media. Cells were mixed with fluconazole (Cayman Chemical) for a final volume  
508 of 100 $\mu$ l per well in a 96 well polystyrene microplate with concentrations of fluconazole  
509 ranging from 0-256  $\mu$ g/mL. Plates were incubated at 35°C and MICs were recorded at  
510 24 hours. MICs were determined visually and were counted as wells where >90% of  
511 growth was inhibited.

### 512 **Nile Red Assay**

513 Fluorescence-based Nile red assays were performed as previously described (46).  
514 Briefly, cells were grown overnight in SC media to saturation. Cells were back diluted to  
515 an O.D.<sub>600</sub> of 0.1 and grown for 6 hours. Cells were collected then washed with PBS  
516 twice and incubated in 1.5mL of PBS+2% glucose for 1 hour. Next, 2.87  $\mu$ L of a  
517 1mg/mL stock of Nile red (Sigma) was added to each sample and incubated at 30°C  
518 shaking for an additional 30 minutes. Samples were washed twice with PBS and placed  
519 in triplicate in a black 96-well flat-bottomed polystyrene microplate. Fluorescence was



520 detected using a Bio-Tek Synergy 4 multimode plate reader using an excitation  
521 wavelength of 553nm and an emission wavelength of 636nm.

522

### 523 **Chromatin Immunoprecipitation**

524 ZipChIP was performed as previously described (69). Briefly, 50 ml cultures were grown  
525 to log phase (OD<sub>600</sub> of 0.6) in SC complete media at 30° shaking. Treated cells were  
526 dosed with 64µg/mL fluconazole (Cayman Chemical) at an OD<sub>600</sub> of 0.2 for 3 hours.  
527 Additionally, cultures were grown to saturation, back diluted to an O.D.<sub>600</sub> of 0.6, treated  
528 with 64µg/mL fluconazole for 3 hours and collected. Cells were formaldehyde cross-  
529 linked and harvested as previously described (69). Cell lysates were precleared with 5  
530 µl of unbound Protein G magnetic beads for 30 min rotating at 4°. A total of 12.5 µl of  
531 precleared lysate was immunoprecipitated with 10 µl of Protein G magnetic beads  
532 (10004D; Life Technologies) conjugated to 1 µl of Histone H3K4me3 antibody (Millipore  
533 07-473) or Histone H3 antibody (Abcam ab1791). Probe sets used in qRT-PCR are  
534 described in supplemental Table S5.

535

### 536 **ACKNOWLEDGEMENTS**

537 This work was supported by grants from the National Institutes of Health to S.D.B  
538 (AI136995), the Purdue Department of Biochemistry Bird Stair Fellowship (to K.M.B.),  
539 Purdue Center for Cancer Research (Grant P30CA023168: DNA Sequencing Shared  
540 Resource and Collaborative Core for Cancer Bioinformatics at Purdue), Walther Cancer  
541 Foundation and the IU Simon Cancer Center (Grant P30CA082709). Additional funding



542 support was provided by the NIFA 1007570 (S.D.B). We thank the Purdue

543 Bioinformatics Core for their pipelines and bioinformatics software.

544

545

## 546 REFERENCES

- 547 1. Wisplinghoff H, Bischoff T, Tallent SM, Seifert H, Wenzel RP, Edmond MB. 2004.  
548 Nosocomial bloodstream infections in US hospitals: Analysis of 24,179 cases from a  
549 prospective nationwide surveillance study. *Clinical Infectious Diseases* 39:309-317.
- 550 2. Wisplinghoff H, Ebbers J, Geurtz L, Stefanik D, Major Y, Edmond MB, Wenzel RP,  
551 Seifert H. 2014. Nosocomial bloodstream infections due to *Candida* spp. in the USA:  
552 species distribution, clinical features and antifungal susceptibilities. *International Journal*  
553 *of Antimicrobial Agents* 43:78-81.
- 554 3. Chen S, Slavin M, Nguyen Q, Marriott D, Playford EG, Ellis D, Sorrell T, Study AC. 2006.  
555 Active surveillance for candidemia, Australia. *Emerg Infect Dis* 12:1508-16.
- 556 4. Chouhan S, Kallianpur S, Prabhu KT, Tijare M, Kasetty S, Gupta S. 2019. Candidal  
557 Prevalence in Diabetics and its Species Identification. *Int J Appl Basic Med Res* 9:49-54.
- 558 5. Khatib R, Johnson LB, Fakih MG, Riederer K, Briski L. 2016. Current trends in  
559 candidemia and species distribution among adults: *Candida glabrata* surpasses *C.*  
560 *albicans* in diabetic patients and abdominal sources. *Mycoses* 59:781-786.
- 561 6. Hachem R, Hanna H, Kontoyiannis D, Jiang Y, Raad I. 2008. The changing  
562 epidemiology of invasive candidiasis: *Candida glabrata* and *Candida krusei* as the  
563 leading causes of candidemia in hematologic malignancy. *Cancer* 112:2493-9.
- 564 7. Vermitsky JP, Edlind TD. 2004. Azole resistance in *Candida glabrata*: coordinate  
565 upregulation of multidrug transporters and evidence for a Pdr1-like transcription factor.  
566 *Antimicrob Agents Chemother* 48:3773-81.
- 567 8. Pelz RK, Lipsett PA, Swoboda SM, Diener-West M, Powe NR, Brower RG, Perl TM,  
568 Hammond JM, Hendrix CW. 2000. *Candida* infections: Outcome and attributable ICU  
569 costs in critically ill patients. *Journal of Intensive Care Medicine* 15:255-261.
- 570 9. Rentz AM, Halpern MT, Bowden R. 1998. The impact of candidemia on length of  
571 hospital stay, outcome, and overall cost of illness. *Clinical Infectious Diseases* 27:781-  
572 788.
- 573 10. Pfaller MA, Jones RN, Messer SA, Edmond MB, Wenzel RP, Grp SP. 1998. National  
574 surveillance of nosocomial blood stream infection due to species of *Candida* other than  
575 *Candida albicans*: Frequency of occurrence and antifungal susceptibility in the SCOPE  
576 program. *Diagnostic Microbiology and Infectious Disease* 30:121-129.
- 577 11. Pappas PG, Kauffman CA, Andes DR, Clancy CJ, Marr KA, Ostrosky-Zeichner L, Reboli  
578 AC, Schuster MG, Vazquez JA, Walsh TJ, Zaoutis TE, Sobel JD. 2016. Clinical Practice  
579 Guideline for the Management of Candidiasis: 2016 Update by the Infectious Diseases  
580 Society of America. *Clin Infect Dis* 62:e1-50.
- 581 12. Whaley SG, Rogers PD. 2016. Azole Resistance in *Candida glabrata*. *Curr Infect Dis*  
582 *Rep* 18:41.
- 583 13. Tscherner M, Schwarzmüller T, Kuchler K. 2011. Pathogenesis and Antifungal Drug  
584 Resistance of the Human Fungal Pathogen *Candida glabrata*. *Pharmaceuticals (Basel)*  
585 4:169-86.
- 586 14. Tsai HF, Krol AA, Sarti KE, Bennett JE. 2006. *Candida glabrata* PDR1, a transcriptional  
587 regulator of a pleiotropic drug resistance network, mediates azole resistance in clinical  
588 isolates and petite mutants. *Antimicrob Agents Chemother* 50:1384-92.
- 589 15. Galkina KV, Okamoto M, Chibana H, Knorre DA, Kajiwara S. 2020. Deletion of CDR1  
590 reveals redox regulation of pleiotropic drug resistance in *Candida glabrata*. *Biochimie*  
591 170:49-56.
- 592 16. Warrillow AG, Mullins JG, Hull CM, Parker JE, Lamb DC, Kelly DE, Kelly SL. 2012. S279  
593 point mutations in *Candida albicans* Sterol 14- $\alpha$  demethylase (CYP51) reduce in vitro  
594 inhibition by fluconazole. *Antimicrob Agents Chemother* 56:2099-107.

- 595 17. Flowers SA, Barker KS, Berkow EL, Toner G, Chadwick SG, Gygas SE, Morschhäuser  
596 J, Rogers PD. 2012. Gain-of-function mutations in UPC2 are a frequent cause of ERG11  
597 upregulation in azole-resistant clinical isolates of *Candida albicans*. *Eukaryot Cell*  
598 11:1289-99.
- 599 18. Sanguinetti M, Posteraro B, Fiori B, Ranno S, Torelli R, Fadda G. 2005. Mechanisms of  
600 azole resistance in clinical isolates of *Candida glabrata* collected during a hospital  
601 survey of antifungal resistance. *Antimicrob Agents Chemother* 49:668-79.
- 602 19. Whaley SG, Berkow EL, Rybak JM, Nishimoto AT, Barker KS, Rogers PD. 2017. Azole  
603 Antifungal Resistance in *Candida albicans* and Emerging Non-*albicans* *Candida*  
604 Species. *Frontiers in Microbiology* 7:2173.
- 605 20. Sanglard D, Ischer F, Calabrese D, Majcherczyk PA, Bille J. 1999. The ATP binding  
606 cassette transporter gene *CgCDR1* from *Candida glabrata* is involved in the resistance  
607 of clinical isolates to azole antifungal agents. *Antimicrob Agents Chemother* 43:2753-65.
- 608 21. O'Kane CJ, Hyland EM. 2019. Yeast epigenetics: the inheritance of histone modification  
609 states. *Biosci Rep* 39:1-13.
- 610 22. Li X, Cai Q, Mei H, Zhou X, Shen Y, Li D, Liu W. 2015. The Rpd3/Hda1 family of histone  
611 deacetylases regulates azole resistance in *Candida albicans*. *J Antimicrob Chemother*  
612 70:1993-2003.
- 613 23. Robbins N, Leach MD, Cowen LE. 2012. Lysine deacetylases Hda1 and Rpd3 regulate  
614 Hsp90 function thereby governing fungal drug resistance. *Cell Rep* 2:878-88.
- 615 24. Shivarathri R, Tscherner M, Zwolanek F, Singh NK, Chauhan N, Kuchler K. 2019. The  
616 Fungal Histone Acetyl Transferase Gcn5 Controls Virulence of the Human Pathogen  
617 *Candida albicans* through Multiple Pathways. *Sci Rep* 9:9445.
- 618 25. Lopes da Rosa J, Boyartchuk VL, Zhu LJ, Kaufman PD. 2010. Histone acetyltransferase  
619 Rtt109 is required for *Candida albicans* pathogenesis. *Proc Natl Acad Sci U S A*  
620 107:1594-9.
- 621 26. Orta-Zavalza E, Guerrero-Serrano G, Gutierrez-Escobedo G, Canas-Villamar I, Juarez-  
622 Cepeda J, Castano I, De Las Penas A. 2013. Local silencing controls the oxidative  
623 stress response and the multidrug resistance in *Candida glabrata*. *Mol Microbiol*  
624 88:1135-48.
- 625 27. Filler EE, Liu Y, Solis NV, Wang L, Diaz LF, Edwards JE, Filler SG, Yeaman MR. 2021.  
626 Identification of *Candida glabrata* Transcriptional Regulators That Govern Stress  
627 Resistance and Virulence. *Infect Immun* 89:3.
- 628 28. South PF, Harmeyer KM, Serratore ND, Briggs SD. 2013. H3K4 methyltransferase Set1  
629 is involved in maintenance of ergosterol homeostasis and resistance to Brefeldin A.  
630 10:E1016-E1025.
- 631 29. Serratore ND, Baker KM, Macadlo LA, Gress AR, Powers BL, Atallah N, Westerhouse  
632 KM, Hall MC, Weake VM, Briggs SD. 2018. A Novel Sterol-Signaling Pathway Governs  
633 Azole Antifungal Drug Resistance and Hypoxic Gene Repression in. *Genetics* 208:1037-  
634 1055.
- 635 30. Raman S, Nguyen M, Zhang Z, Cheng S, Jia H, Weisner N, Iczkowski K, Clancy C.  
636 2006. *Candida albicans* SET1 encodes a histone 3 lysine 4 methyltransferase that  
637 contributes to the pathogenesis of invasive candidiasis. *Mol Microbiol* 60:697-709.
- 638 31. Briggs SD, Bryk M, Strahl BD, Cheung WL, Davie JK, Dent SY, Winston F, Allis CD.  
639 2001. Histone H3 lysine 4 methylation is mediated by Set1 and required for cell growth  
640 and rDNA silencing in *Saccharomyces cerevisiae*. *Genes Dev* 15:3286-95.
- 641 32. Roguev A, Schaft D, Shevchenko A, Pijnappel WW, Wilm M, Aasland R, Stewart AF.  
642 2001. The *Saccharomyces cerevisiae* Set1 complex includes an Ash2 homologue and  
643 methylates histone 3 lysine 4. *EMBO J* 20:7137-48.

- 644 33. Nagy PL, Griesenbeck J, Kornberg RD, Cleary ML. 2002. A trithorax-group complex  
645 purified from *Saccharomyces cerevisiae* is required for methylation of histone H3. *Proc*  
646 *Natl Acad Sci U S A* 99:90-4.
- 647 34. Dehe PM, Dichtl B, Schaft D, Roguev A, Pamblanco M, Lebrun R, Rodriguez-Gil A,  
648 Mkandawire M, Landsberg K, Shevchenko A, Shevchenko A, Rosaleny LE, Tordera V,  
649 Chavez S, Stewart AF, Geli V. 2006. Protein interactions within the Set1 complex and  
650 their roles in the regulation of histone 3 lysine 4 methylation. *J Biol Chem* 281:35404-12.
- 651 35. Takahashi YH, Westfield GH, Oleskie AN, Trievel RC, Shilatifard A, Skiniotis G. 2011.  
652 Structural analysis of the core COMPASS family of histone H3K4 methylases from yeast  
653 to human. *Proc Natl Acad Sci U S A* 108:20526-31.
- 654 36. Mersman DP, Du HN, Fingerhahn IM, South PF, Briggs SD. 2012. Charge-based  
655 interaction conserved within histone H3 lysine 4 (H3K4) methyltransferase complexes is  
656 needed for protein stability, histone methylation, and gene expression. *J Biol Chem*  
657 287:2652-65.
- 658 37. Shilatifard A. 2012. The COMPASS family of histone H3K4 methylases: mechanisms of  
659 regulation in development and disease pathogenesis. *Annu Rev Biochem* 81:65-95.
- 660 38. Mueller JE, Canze M, Bryk M. 2006. The requirements for COMPASS and Paf1 in  
661 transcriptional silencing and methylation of histone H3 in *Saccharomyces cerevisiae*.  
662 *Genetics* 173:557-67.
- 663 39. Eissenberg JC, Shilatifard A. 2010. Histone H3 lysine 4 (H3K4) methylation in  
664 development and differentiation. *Dev Biol* 339:240-9.
- 665 40. Zordan R, Ren Y, Pan S, Rotondo G, De Las Penas A, Lluore J, Cormack B. 2013.  
666 Expression plasmids for use in *Candida glabrata*.  
667 doi:10.1534/g3.113.006908. 10.1534/g3.113.006908:1675-86.
- 668 41. Schlichter A, Cairns BR. 2005. Histone trimethylation by Set1 is coordinated by the  
669 RRM, autoinhibitory, and catalytic domains. *EMBO J* 24:1222-31.
- 670 42. Soares LM, Radman-Livaja M, Lin SG, Rando OJ, Buratowski S. 2014. Feedback  
671 control of Set1 protein levels is important for proper H3K4 methylation patterns. *Cell Rep*  
672 6:961-972.
- 673 43. Kitada K, Yamaguchi E, Arisawa M. 1995. Cloning of the *Candida glabrata* TRP1 and  
674 HIS3 genes, and construction of their disruptant strains by sequential integrative  
675 transformation. *Gene* 165:203-6.
- 676 44. Vermitsky JP, Earhart KD, Smith WL, Homayouni R, Edlind TD, Rogers PD. 2006. Pdr1  
677 regulates multidrug resistance in *Candida glabrata*: gene disruption and genome-wide  
678 expression studies. *Mol Microbiol* 61:704-22.
- 679 45. Whaley SG, Zhang Q, Caudle KE, Rogers PD. 2018. Relative Contribution of the ABC  
680 Transporters Cdr1, Pdh1, and Snq2 to Azole Resistance in *Candida glabrata*. *Antimicrob*  
681 *Agents Chemother* 62:10.
- 682 46. Tsao S, Weber S, Cameron C, Nehme D, Ahmadzadeh E, Raymond M. 2016. Positive  
683 regulation of the *Candida albicans* multidrug efflux pump Cdr1p function by  
684 phosphorylation of its N-terminal extension. *Journal of Antimicrobial Chemotherapy*  
685 71:3125-3134.
- 686 47. Ivnitski-Steele I, Holmes A, Lamping E, Monk B, Cannon R, Sklar L. 2009. Identification  
687 of Nile red as a fluorescent substrate of the *Candida albicans* ATP-binding cassette  
688 transporters Cdr1p and Cdr2p and the major facilitator superfamily transporter Mdr1p.  
689 *Analytical biochemistry* 394:87-91.
- 690 48. Flowers SA, Colon B, Whaley SG, Schuler MA, Rogers PD. 2015. Contribution of  
691 clinically derived mutations in ERG11 to azole resistance in *Candida albicans*.  
692 *Antimicrob Agents Chemother* 59:450-60.
- 693 49. Kelly SL, Lamb DC, Kelly DE. 1997. Sterol 22-desaturase, cytochrome P45061,  
694 possesses activity in xenobiotic metabolism. *FEBS Lett* 412:233-5.

- 695 50. Morio F, Pagniez F, Lacroix C, Miegerville M, Le Pape P. 2012. Amino acid substitutions  
696 in the *Candida albicans* sterol Delta5,6-desaturase (Erg3p) confer azole resistance:  
697 characterization of two novel mutants with impaired virulence. *J Antimicrob Chemother*  
698 67:2131-8.
- 699 51. Kelly SL, Lamb DC, Kelly DE, Manning NJ, Loeffler J, Hebart H, Schumacher U, Einsele  
700 H. 1997. Resistance to fluconazole and cross-resistance to amphotericin B in *Candida*  
701 *albicans* from AIDS patients caused by defective sterol delta5,6-desaturation. *FEBS Lett*  
702 400:80-2.
- 703 52. Watson PF, Rose ME, Ellis SW, England H, Kelly SL. 1989. Defective sterol C5-6  
704 desaturation and azole resistance: a new hypothesis for the mode of action of azole  
705 antifungals. *Biochem Biophys Res Commun* 164:1170-5.
- 706 53. Vu B, Thomas G, Moye-Rowley W. 2019. Evidence that Ergosterol Biosynthesis  
707 Modulates Activity of the Pdr1 Transcription Factor in *Candida glabrata*. *mBio* 10.
- 708 54. Moye-Rowley WS. 2020. Linkage between genes involved in azole resistance and  
709 ergosterol biosynthesis. *PLoS Pathog* 16:e1008819.
- 710 55. Yu SJ, Chang YL, Chen YL. 2018. Deletion of ADA2 Increases Antifungal Drug  
711 Susceptibility and Virulence in *Candida glabrata*. *Antimicrob Agents Chemother* 62:3.
- 712 56. Zavrel M, Hoot SJ, White TC. 2013. Comparison of sterol import under aerobic and  
713 anaerobic conditions in three fungal species, *Candida albicans*, *Candida glabrata*, and  
714 *Saccharomyces cerevisiae*. *Eukaryot Cell* 12:725-38.
- 715 57. Zhang L, Xu W. 2015. Histone deacetylase inhibitors for enhancing activity of antifungal  
716 agent: a patent evaluation of WO2014041424(A1). *Expert Opin Ther Pat* 25:237-40.
- 717 58. Mai A, Rotili D, Massa S, Brosch G, Simonetti G, Passariello C, Palamara AT. 2007.  
718 Discovery of uracil-based histone deacetylase inhibitors able to reduce acquired  
719 antifungal resistance and trailing growth in *Candida albicans*. *Bioorg Med Chem Lett*  
720 17:1221-5.
- 721 59. Hnisz D, Majer O, Frohner IE, Komnenovic V, Kuchler K. 2010. The Set3/Hos2 histone  
722 deacetylase complex attenuates cAMP/PKA signaling to regulate morphogenesis and  
723 virulence of *Candida albicans*. *PLoS Pathog* 6:e1000889.
- 724 60. Pfaller MA, Messer SA, Georgopapadakou N, Martell LA, Besterman JM, Diekema DJ.  
725 2009. Activity of MGCD290, a Hos2 histone deacetylase inhibitor, in combination with  
726 azole antifungals against opportunistic fungal pathogens. *J Clin Microbiol* 47:3797-804.
- 727 61. Pfaller MA, Rhomberg PR, Messer SA, Castanheira M. 2015. In vitro activity of a Hos2  
728 deacetylase inhibitor, MGCD290, in combination with echinocandins against  
729 echinocandin-resistant *Candida* species. *Diagn Microbiol Infect Dis* 81:259-63.
- 730 62. Smith WL, Edlind TD. 2002. Histone deacetylase inhibitors enhance *Candida albicans*  
731 sensitivity to azoles and related antifungals: correlation with reduction in CDR and ERG  
732 upregulation. *Antimicrob Agents Chemother* 46:3532-9.
- 733 63. Kim T, Buratowski S. 2009. Dimethylation of H3K4 by Set1 recruits the Set3 histone  
734 deacetylase complex to 5' transcribed regions. *Cell* 137:259-72.
- 735 64. Pijnappel WW, Schaft D, Roguev A, Shevchenko A, Tekotte H, Wilm M, Rigaut G,  
736 Seraphin B, Aasland R, Stewart AF. 2001. The *S. cerevisiae* SET3 complex includes two  
737 histone deacetylases, Hos2 and Hst1, and is a meiotic-specific repressor of the  
738 sporulation gene program. *Genes Dev* 15:2991-3004.
- 739 65. Zhou Y, Liao M, Zhu C, Hu Y, Tong T, Peng X, Li M, Feng M, Cheng L, Ren B, Zhou X.  
740 2018. ERG3 and ERG11 genes are critical for the pathogenesis of *Candida albicans*  
741 during the oral mucosal infection. *Int J Oral Sci* 10:9.
- 742 66. Becker JM, Kauffman SJ, Hauser M, Huang L, Lin M, Sillaots S, Jiang B, Xu D, Roemer  
743 T. 2010. Pathway analysis of *Candida albicans* survival and virulence determinants in a  
744 murine infection model. *Proc Natl Acad Sci U S A* 107:22044-9.



- 745 67. Miyazaki T, Miyazaki Y, Izumikawa K, Kakeya H, Miyakoshi S, Bennett JE, Kohno S.  
746 2006. Fluconazole treatment is effective against a *Candida albicans* *erg3/erg3* mutant in  
747 vivo despite in vitro resistance. *Antimicrob Agents Chemother* 50:580-6.
- 748 68. Fingerman IM, Wu CL, Wilson BD, Briggs SD. 2005. Global loss of Set1-mediated H3  
749 Lys4 trimethylation is associated with silencing defects in *Saccharomyces cerevisiae*. *J*  
750 *Biol Chem* 280:28761-5.
- 751 69. Harmeyer KM, South PF, Bishop B, Ogas J, Briggs SD. 2015. Immediate chromatin  
752 immunoprecipitation and on-bead quantitative PCR analysis: a versatile and rapid ChIP  
753 procedure. *Nucleic Acids Res* 43:e38.
- 754 70. Agarwal AK, Rogers PD, Baerson SR, Jacob MR, Barker KS, Cleary JD, Walker LA,  
755 Nagle DG, Clark AM. 2003. Genome-wide expression profiling of the response to  
756 polyene, pyrimidine, azole, and echinocandin antifungal agents in *Saccharomyces*  
757 *cerevisiae*. *J Biol Chem* 278:34998-5015.
- 758 71. Dobin A, Davis CA, Schlesinger F, Drenkow J, Zaleski C, Jha S, Batut P, Chaisson M,  
759 Gingeras TR. 2013. STAR: ultrafast universal RNA-seq aligner. *Bioinformatics* 29:15-21.
- 760 72. Anders S, Pyl PT, Huber W. 2015. HTSeq—a Python framework to work with high-  
761 throughput sequencing data. *Bioinformatics* 31:166-169.
- 762 73. Zanini F, Anders S. 2021(in preparation). HTSeq 2.0 – Efficient manipulation of high-  
763 throughput sequencing data with long genomes.
- 764 74. Benjamini Y, Hochberg Y. 1995. Controlling the False Discovery Rate - a Practical and  
765 Powerful Approach to Multiple Testing. *Journal of the Royal Statistical Society Series B-*  
766 *Statistical Methodology* 57:289-300.
- 767 75. Love MI, Huber W, Anders S. 2014. Moderated estimation of fold change and dispersion  
768 for RNA-seq data with DESeq2. *Genome Biology* 15:550.
- 769 76. Zhang Y, Serratore ND, Briggs SD. 2017. N-ICE plasmids for generating N-terminal 3 x  
770 FLAG tagged genes that allow inducible, constitutive or endogenous expression in  
771 *Saccharomyces cerevisiae*. *Yeast* 34:223-235.
- 772 77. South PF, Fingerman IM, Mersman DP, Du HN, Briggs SD. 2010. A conserved  
773 interaction between the SDI domain of Bre2 and the Dpy-30 domain of Sdc1 is required  
774 for histone methylation and gene expression. *J Biol Chem* 285:595-607.
- 775 78. CLSI. Reference Method for Broth Dilution Antifungal Susceptibility Testing of Yeasts;  
776 Approved Standard—Third Edition. 2008. CLSI document M27-A3, Wayne, PA: Clinical  
777 and Laboratory Standards Institute.

778

779

780

781

782

783

784 **FIGURE LEGENDS**

785 **FIG 1** *Loss of Set1-mediated mono-, di-, and trimethylation at histone H3K4 in*  
786 *Saccharomyces cerevisiae and Candida glabrata results in increased azole*  
787 *susceptibility and delayed growth in vitro.* (A) Five-fold serial dilution spot assays of  
788 the indicated *S. cerevisiae* strains were grown on SC media with and without 8  
789  $\mu\text{g}/\text{mL}$  fluconazole and incubated at 30°C for 72 hours. (B & D) Whole cell extracts  
790 isolated from the indicated strains were immunoblotted using histone H3K4 methyl-  
791 specific mono-, di- and trimethylation antibodies of whole cell extracts isolated from  
792 the indicated strains. Histone H3 was used as a loading control. (C) Five-fold serial  
793 dilution spot assays of the indicated *C. glabrata* strains were grown on SC media  
794 with and without 32  $\mu\text{g}/\text{mL}$  fluconazole and incubated at 30°C for 48 hours. (E)  
795 Liquid growth curve assay of the indicated *C. glabrata* strains grown over 50 hours  
796 with or without 32  $\mu\text{g}/\text{mL}$  fluconazole.

797 **FIG 2** *Deletion of Set1 complex members in C. glabrata results in increased azole*  
798 *susceptibility and loss of histone H3K4 methylation.* (A) MIC assay of the indicated  
799 strains performed in RPMI 1640 media at 35°C and results recorded after 48 hours  
800 of incubation. (B) Five-fold serial dilution spot assays of the indicated *C. glabrata*  
801 strains were grown on SC plates with or without 32  $\mu\text{g}/\text{ml}$  fluconazole. (C) Whole  
802 cell extracts isolated from the indicated strains were immunoblotted using H3K4  
803 methyl-specific mono-, di- and trimethylation antibodies. Histone H3 was used as a  
804 loading control.

805 **FIG 3** *The catalytic activity of the SET domain is necessary for Set1-mediated*  
806 *histone H3K4 methylation and increased azole susceptibility in C. glabrata.* (A)

807 Five-fold serial dilution spot assays of the indicated *C. glabrata* strains were grown  
808 on SC plates with or without 32 µg/ml fluconazole. (B) Whole cell extracts isolated  
809 from the indicated strains were immunoblotted using methyl-specific mono-, di- and  
810 trimethylation antibodies. Histone H3 was used as a loading control.

811 **FIG 4** *Deletion of SET1 in C. glabrata does not alter gene expression levels or*  
812 *function of the efflux drug transporter, CDR1 or transcription factor PDR1. (A and B)*  
813 Expression of indicated genes was determined in *Cg*WT and *Cgset1Δ* strain cells  
814 treated with and without 64 µg/ml fluconazole for 3 hr by qRT-PCR analysis. Gene  
815 expression analysis was set relative to the untreated wild-type and expression was  
816 normalized to *RDN18* mRNA levels. Data were analyzed from ≥ 3 biological  
817 replicates with three technical replicates each. Error bars represent SD. (C) Red  
818 fluorescence units were measured as output in a Nile Red assay to determine the  
819 efficacy of Cdr1 in the indicated strains with and without fluconazole. A *pdr1Δ* strain  
820 was used as a control. Data were analyzed from ≥ 3 biological replicates with three  
821 technical replicates each. Statistics were performed using Graphpad Prism student  
822 t-test version 9.2.0. *ns* represents  $p < 0.05$ ,  $**p < 0.01$ , Error bars represent SD.

823 **FIG 5** *The deletion of SET1 in C. glabrata alters global and local levels of gene*  
824 *expression under untreated and azole conditions. The genome-wide changes in gene*  
825 *expression under azoles were performed using C. glabrata CBS138 WT and set1Δ*  
826 *strains. (A) The PCA for WT and set1Δ azole treated samples relative to WT untreated*  
827 *samples based on the counts per million. (B) Volcano plot showing the significance*  
828 *[-log<sub>2</sub> (FDR), y-axis] vs. the fold change (x-axis) of the DEGs identified in the WT*  
829 *untreated samples relative to set1Δ untreated samples. (C) Volcano plot showing the*



830 significance [ $-\log_2$  (FDR), y-axis] vs. the fold change (x-axis) of the DEGs identified in  
831 the *set1Δ* azole treated samples relative to WT azole treated samples. Genes with  
832 significant differential expression (FDR < 0.05) in (B and C) are highlighted in red or  
833 blue for up- and downregulated genes, respectively. Black highlighted genes are  
834 considered nonsignificant. (D) Genes from the RNA-seq dataset that were statistically  
835 significantly enriched (FDR < 0.05) were used for GO term determination of Set1-  
836 dependent DEGs under azole conditions. Downregulated genes refer to the DEGs that  
837 are dependent on Set1 for activation either directly or indirectly. Significantly enriched  
838 groups of GO terms were identified as the DEGs from only *set1Δ* and WT azole treated  
839 samples. (E and F) Expression of indicated genes was determined in WT and *set1Δ*  
840 strain cells treated with 64 μg/ml fluconazole for 3 hr by qRT-PCR analysis. Gene  
841 expression analysis was set relative to the untreated wild-type and expression was  
842 normalized to *RDN18* mRNA levels. Data were analyzed from ≥ 3 biological replicates  
843 with three technical replicates each. Statistics were performed using Graphpad Prism  
844 student t-test version 9.2.0. \*\*\*\* $p < 0.0001$  and \*\* $p = 0.002$ . Error bars represent SD..

845 **FIG 6** *Histone H3K4 trimethylation is enriched on ERG gene chromatin and Set1-*  
846 *mediated histone H3K4 methyltransferase activity is required for azole induction of ERG*  
847 *genes. (A and B) ChIP analysis of histone H3K4 tri-methylation levels at the promoter,*  
848 *5', and 3' regions of ERG11 and ERG3 in a wild-type C. glabrata strain with and without*  
849 *64 μg/mL fluconazole treatment. ChIP analysis was set relative to a set1Δ strain and*  
850 *normalized to histone H3 and DNA input levels. Data were analyzed from 5 biological*  
851 *replicates with three technical replicates each, \* $p < 0.05$ . (C and D) Expression of*  
852 *indicated genes was determined in the indicated mutants treated with and without 64*

853  $\mu\text{g/ml}$  fluconazole for 3 hr by qRT-PCR analysis. Gene expression analysis was set  
854 relative to the untreated wild-type containing an empty vector and expression was  
855 normalized to *RDN18* mRNA levels. Data were analyzed from  $\geq 3$  biological replicates  
856 with three technical replicates each. Statistics were performed using Graphpad Prism  
857 student t-test version 9.2.0. \*\*\*\* $p < 0.0001$  and \*\* $p < 0.01$ . Error bars represent SD.

858 **FIG 7** *Model for the role of Set1-H3K4 methylation in epigenetic control of ERG genes*  
859 (Biorender). (A) Under aerobic conditions, the Set1 complex mediates histone H3K4  
860 methylation on chromatin at *ERG* genes. In the presence of azoles, azole-induced  
861 transcriptional activation recruits TFs, RNA Polymerase II, and the Set1 complex to  
862 increases Histone H3K4 methylation. This increase in methylation could permit  
863 additional recruitment of other co-factors/epigenetic regulator (e.g., Set3 and/or SAGA  
864 complex) that contain “reader” domains that recognize and bind to the H3K4 methyl  
865 mark. Thus, this Set1-Erg pathway contributes to the intrinsic azole resistance in *C.*  
866 *glabrata*. In the absence of Set1, histone H3K4 methylation is abolished and failure of  
867 recruiting additional H3K4 methyl “readers” prevent the induction of *ERG* genes, thus  
868 making the *C. glabrata* more susceptible to azole treatment.

869 FIGURES

Figure 1

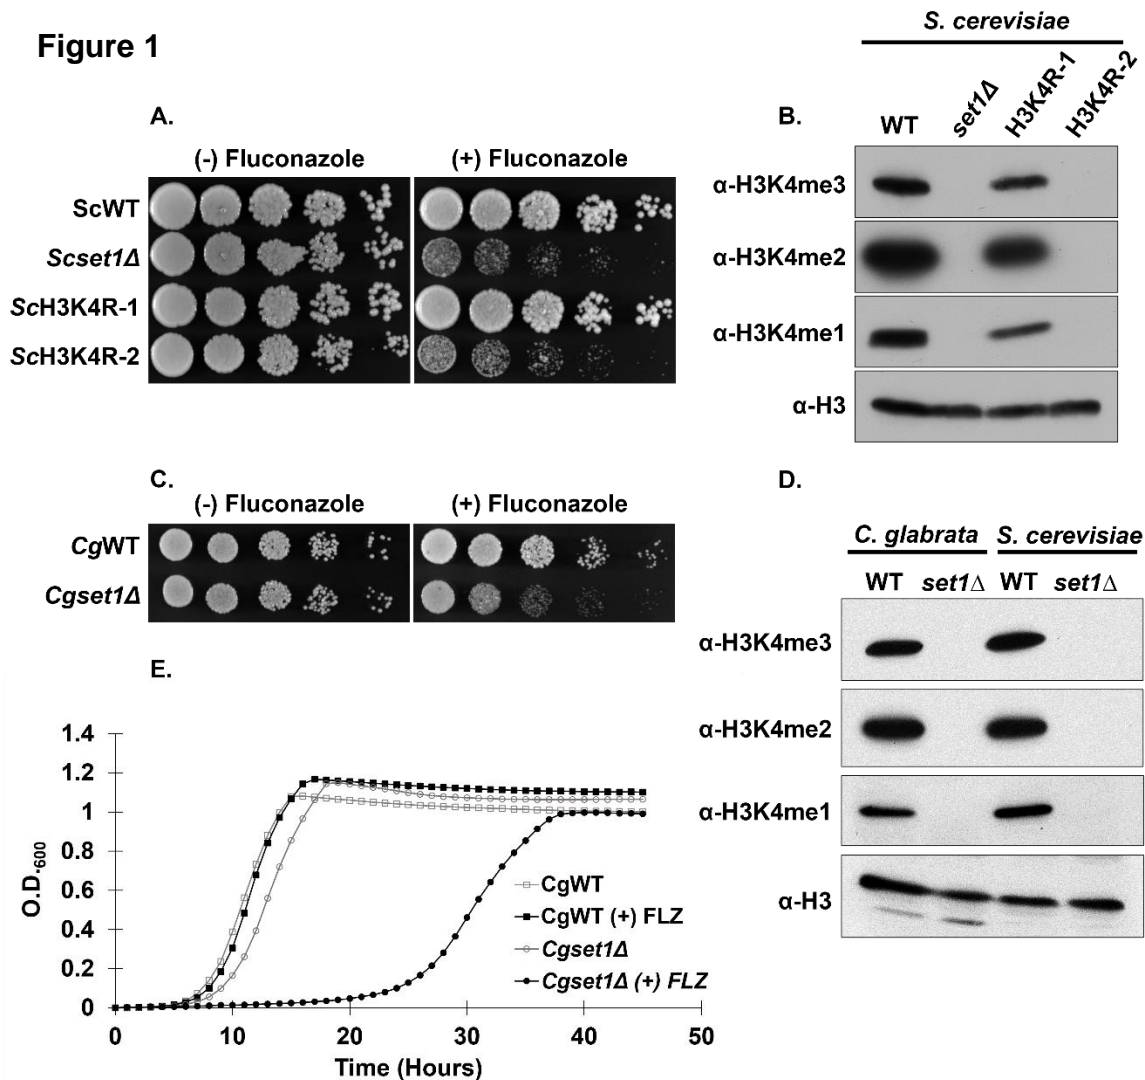

870 **FIG 1** Loss of Set1-mediated mono-, di-, and trimethylation at histone H3K4 in  
 871 *Saccharomyces cerevisiae* and *Candida glabrata* results in increased azole  
 872 susceptibility and delayed growth in vitro. (A) Five-fold serial dilution spot assays of the  
 873 indicated *S. cerevisiae* strains were grown on SC media with and without 8 μg/mL  
 874 fluconazole and incubated at 30°C for 72 hours. (B & D) Whole cell extracts isolated  
 875 from the indicated strains were immunoblotted using histone H3K4 methyl-specific  
 876 mono-, di- and trimethylation antibodies of whole cell extracts isolated from the  
 877 indicated strains. Histone H3 was used as a loading control. (C) Five-fold serial dilution  
 878 spot assays of the indicated *C. glabrata* strains were grown on SC media with and  
 879 without 32 μg/mL fluconazole and incubated at 30°C for 48 hours. (E) Liquid growth  
 880 curve assay of the indicated *C. glabrata* strains grown over 50 hours with or without 32  
 881 μg/mL fluconazole.

**Figure 2**

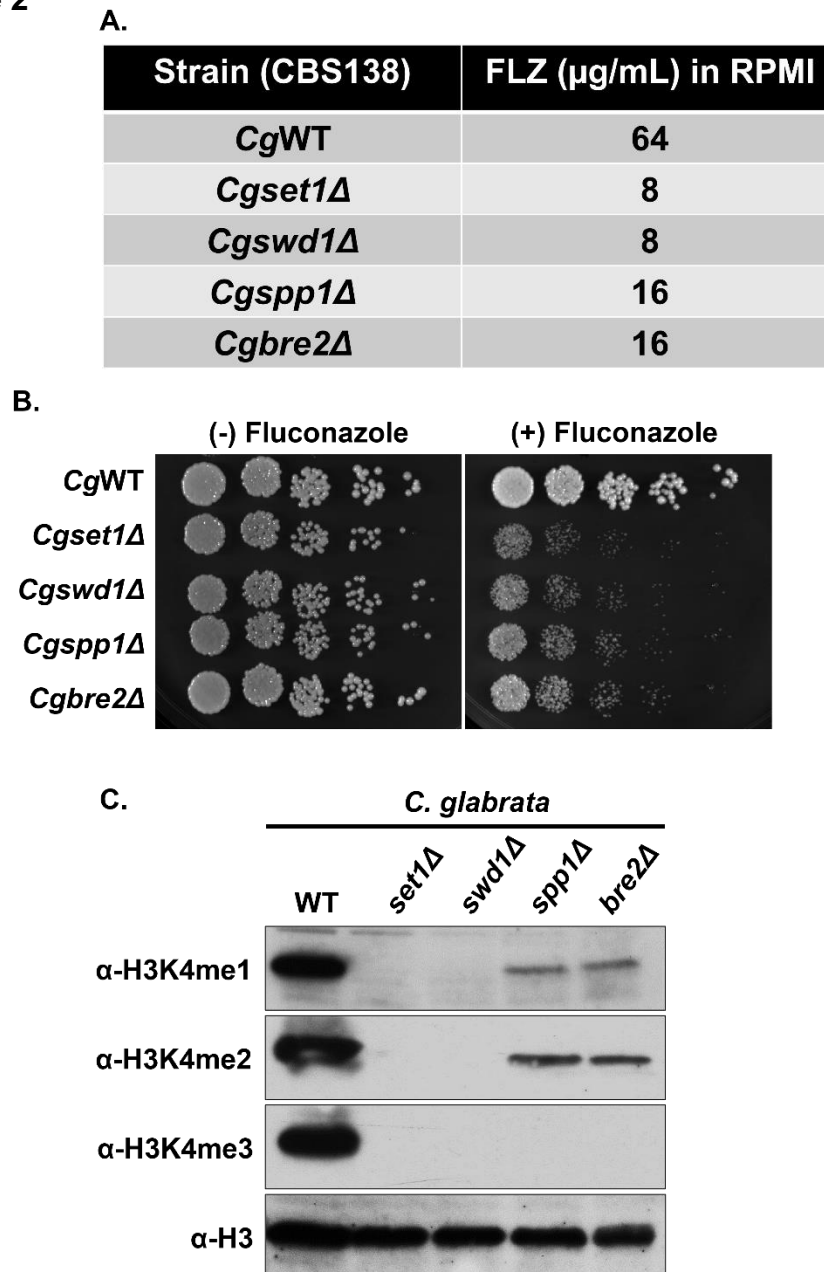

882

883

884 **FIG 2** Deletion of *Set1* complex members in *C. glabrata* results in increased azole

885 susceptibility and loss of histone H3K4 methylation. (A) MIC assay of the indicated

886 strains performed in RPMI 1640 media at 35°C and results recorded after 48 hours of

887 incubation. (B) Five-fold serial dilution spot assays of the indicated *C. glabrata* strains

888 were grown on SC plates with or without 32  $\mu\text{g/ml}$  fluconazole. (C) Whole cell extracts

889 isolated from the indicated strains were immunoblotted using H3K4 methyl-specific

mono-, di- and trimethylation antibodies. Histone H3 was used as a loading control.



**Figure 4**

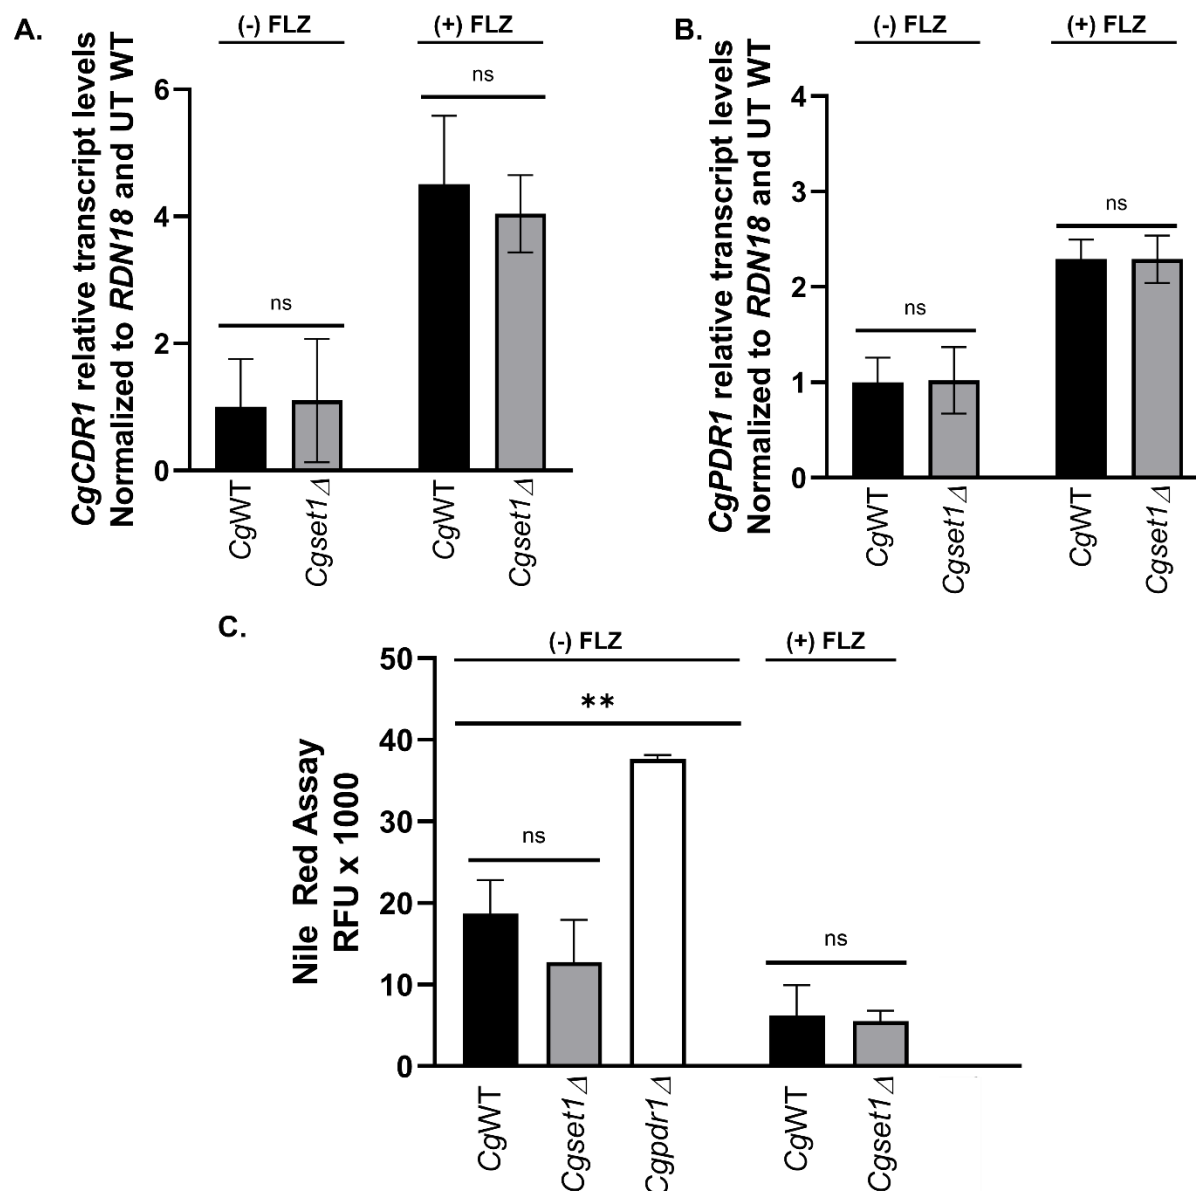

897  
 898 **FIG 4** Deletion of *SET1* in *C. glabrata* does not alter gene expression levels or function  
 899 of the efflux drug transporter, *CDR1* or transcription factor *PDR1*. (A and B) Expression  
 900 of indicated genes was determined in *CgWT* and *Cgset1Δ* strain cells treated with and  
 901 without 64 μg/ml fluconazole for 3 hr by qRT-PCR analysis. Gene expression analysis  
 902 was set relative to the untreated wild-type and expression was normalized to *RDN18*  
 903 mRNA levels. Data were analyzed from ≥ 3 biological replicates with three technical  
 904 replicates each. Error bars represent SD. (C) Red fluorescence units were measured as  
 905 output in a Nile Red assay to determine the efficacy of *Cdr1* in the indicated strains with  
 906 and without fluconazole. A *pd1Δ* strain was used as a control. Data were analyzed from  
 907 ≥ 3 biological replicates with three technical replicates each. Statistics were performed  
 908 using Graphpad Prism student t-test version 9.2.0. *ns* represents  $p < 0.05$ ,  $**p < 0.01$ ,  
 909 Error bars represent SD.  
 910



## Figure 5

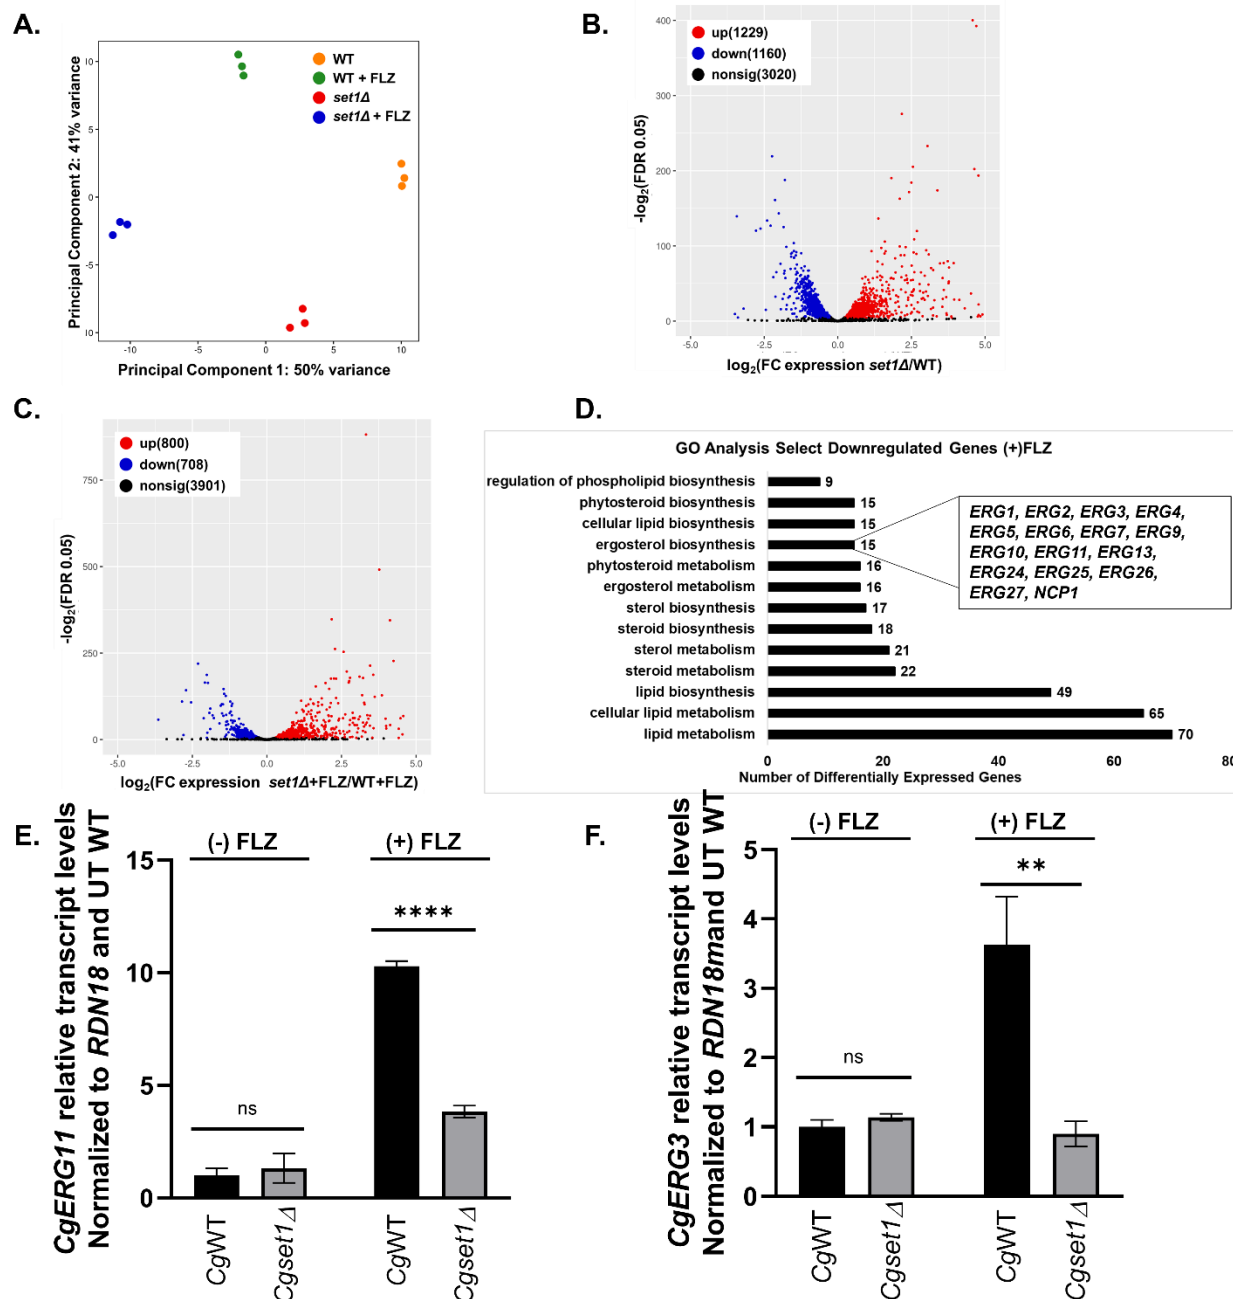

911  
 912 **FIG 5** The deletion of *SET1* in *C. glabrata* alters global and local levels of gene  
 913 expression under untreated and azole conditions. The genome-wide changes in gene  
 914 expression under azoles were performed using *C. glabrata* CBS138 WT and *set1Δ*  
 915 strains. (A) The PCA for WT and *set1Δ* azole treated samples relative to WT untreated  
 916 samples based on the counts per million. (B) Volcano plot showing the significance  
 917 [ $-\log_2(\text{FDR})$ , y-axis] vs. the fold change (x-axis) of the DEGs identified in the WT  
 918 untreated samples relative to *set1Δ* untreated samples. (C) Volcano plot showing the  
 919 significance [ $-\log_2(\text{FDR})$ , y-axis] vs. the fold change (x-axis) of the DEGs identified in  
 920 the *set1Δ* azole treated samples relative to WT azole treated samples. Genes with  
 921 significant differential expression (FDR < 0.05) in (B and C) are highlighted in red or  
 922 blue for up- and downregulated genes, respectively. Black highlighted genes are

923 considered nonsignificant. (D) Genes from the RNA-seq dataset that were statistically  
 924 significantly enriched (FDR < 0.05) were used for GO term determination of Set1-  
 925 dependent DEGs under azole conditions. Downregulated genes refer to the DEGs that  
 926 are dependent on Set1 for activation either directly or indirectly. Significantly enriched  
 927 groups of GO terms were identified as the DEGs from only *set1Δ* and WT azole treated  
 928 samples. (E and F) Expression of indicated genes was determined in WT and *set1Δ*  
 929 strain cells treated with 64 μg/ml fluconazole for 3 hr by qRT-PCR analysis. Gene  
 930 expression analysis was set relative to the untreated wild-type and expression was  
 931 normalized to *RDN18* mRNA levels. Data were analyzed from ≥ 3 biological replicates  
 932 with three technical replicates each. Statistics were performed using Graphpad Prism  
 933 student t-test version 9.2.0. \*\*\*\* $p < 0.0001$  and \*\* $p = 0.002$ . Error bars represent SD.

934 **Figure 6**  
 935

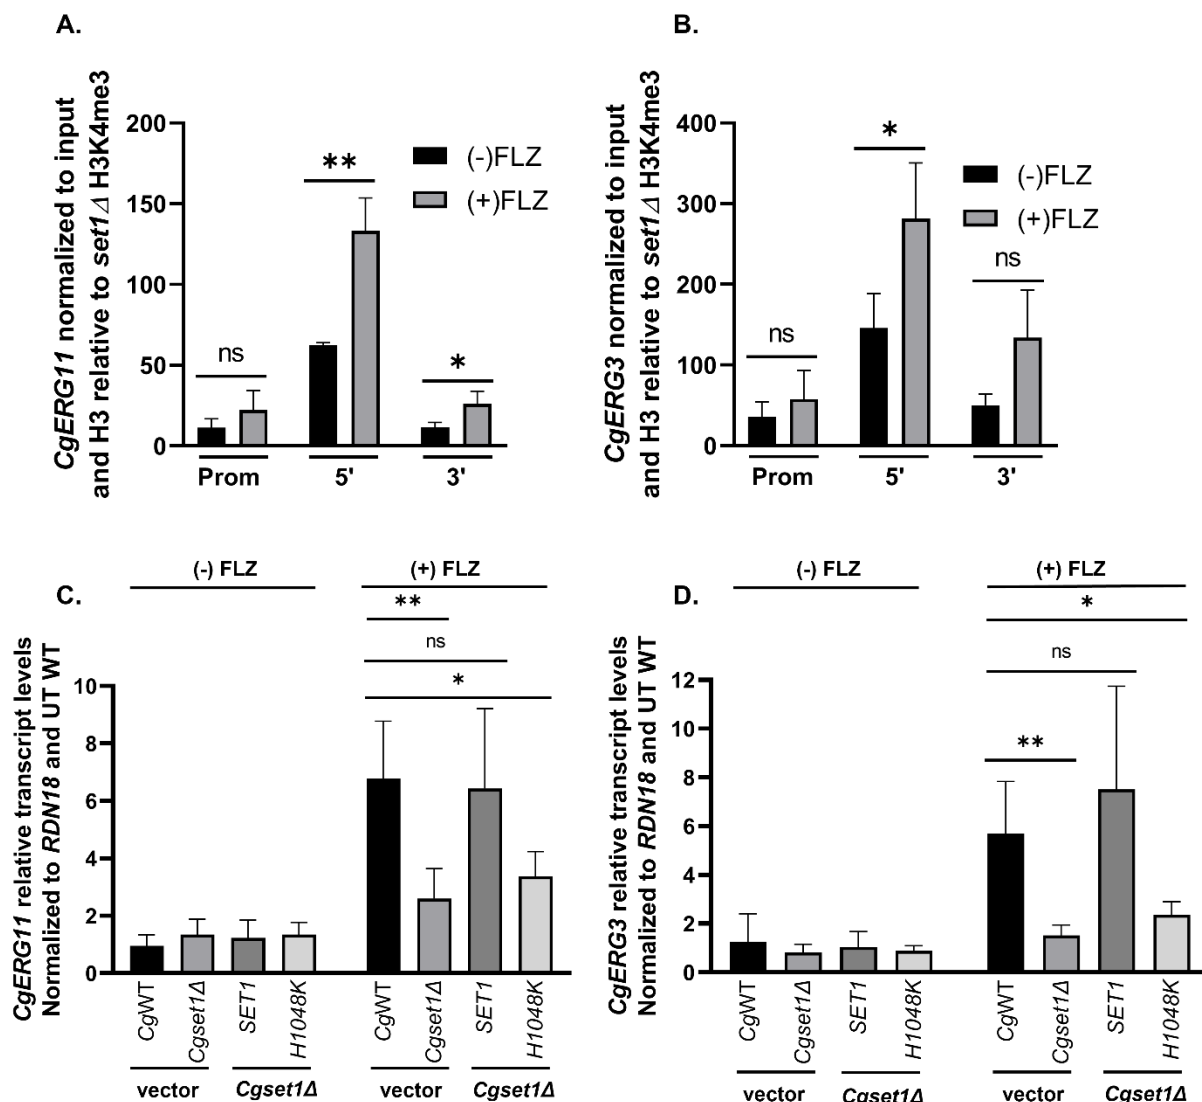

936 **FIG 6** Histone H3K4 trimethylation is enriched on ERG gene chromatin and Set1-  
 937 mediated histone H3K4 methyltransferase activity is required for azole induction of ERG  
 938 genes. (A and B) CHIP analysis of histone H3K4 tri-methylation levels at the promoter,



939 5', and 3' regions of *ERG11* and *ERG3* in a wild-type *C. glabrata* strain with and without  
940 64 µg/mL fluconazole treatment. ChIP analysis was set relative to a *set1Δ* strain and  
941 normalized to histone H3 and DNA input levels. Data were analyzed from 5 biological  
942 replicates with three technical replicates each, \* $p < 0.05$ . (C and D) Expression of  
943 indicated genes was determined in the indicated mutants treated with and without 64  
944 µg/ml fluconazole for 3 hr by qRT-PCR analysis. Gene expression analysis was set  
945 relative to the untreated wild-type containing an empty vector and expression was  
946 normalized to *RDN18* mRNA levels. Data were analyzed from  $\geq 3$  biological replicates  
947 with three technical replicates each. Statistics were performed using Graphpad Prism  
948 student t-test version 9.2.0. \*\*\*\* $p < 0.0001$  and \*\* $p < 0.01$ . Error bars represent SD.  
949  
950

## Figure 7

A.

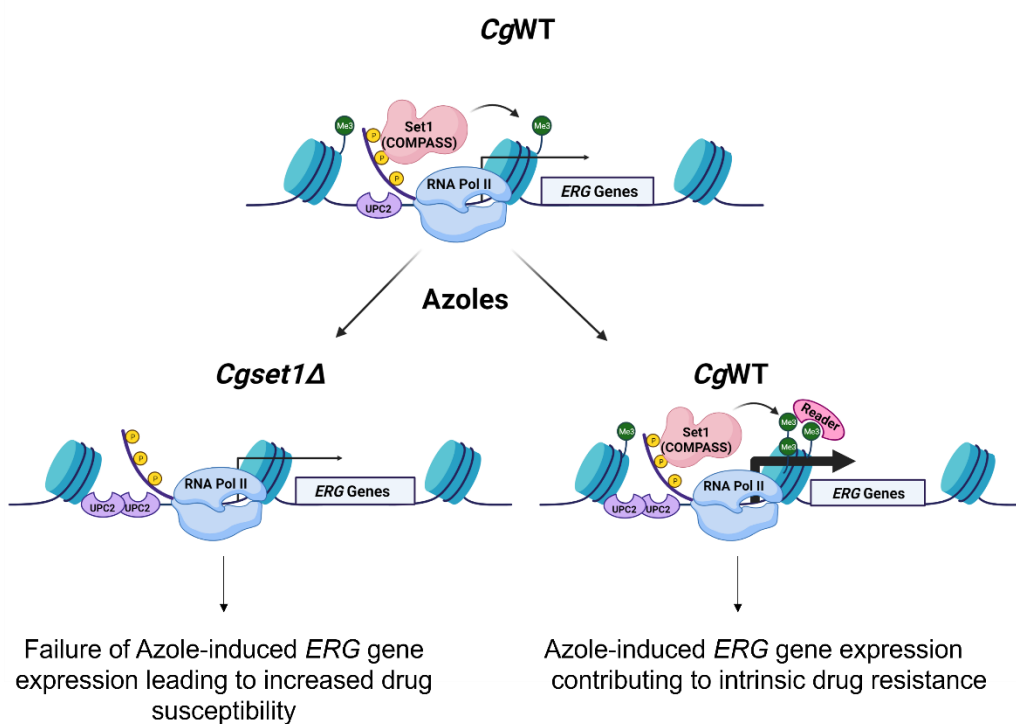

951 **FIG 7** Model for the role of Set1-H3K4 methylation in epigenetic control of ERG genes  
952 (Biorender). (A) Under aerobic conditions, the Set1 complex mediates histone H3K4  
953 methylation on chromatin at ERG genes. In the presence of azoles, azole-induced  
954 transcriptional activation recruits TFs, RNA Polymerase II, and the Set1 complex to  
955 increases Histone H3K4 methylation. This increase in methylation could permit  
956 additional recruitment of other co-factors/epigenetic regulator (e.g., Set3 and/or SAGA  
957 complex) that contain "reader" domains that recognize and bind to the H3K4 methyl  
958 mark. Thus, this Set1-Erg pathway contributes to the intrinsic azole resistance in *C.*  
959 *glabrata*. In the absence of Set1, histone H3K4 methylation is abolished and failure of  
960 recruiting additional H3K4 methyl "readers" prevent the induction of ERG genes, thus  
961 making the *C. glabrata* more susceptible to azole treatment.  
962

963 **Figure S1**

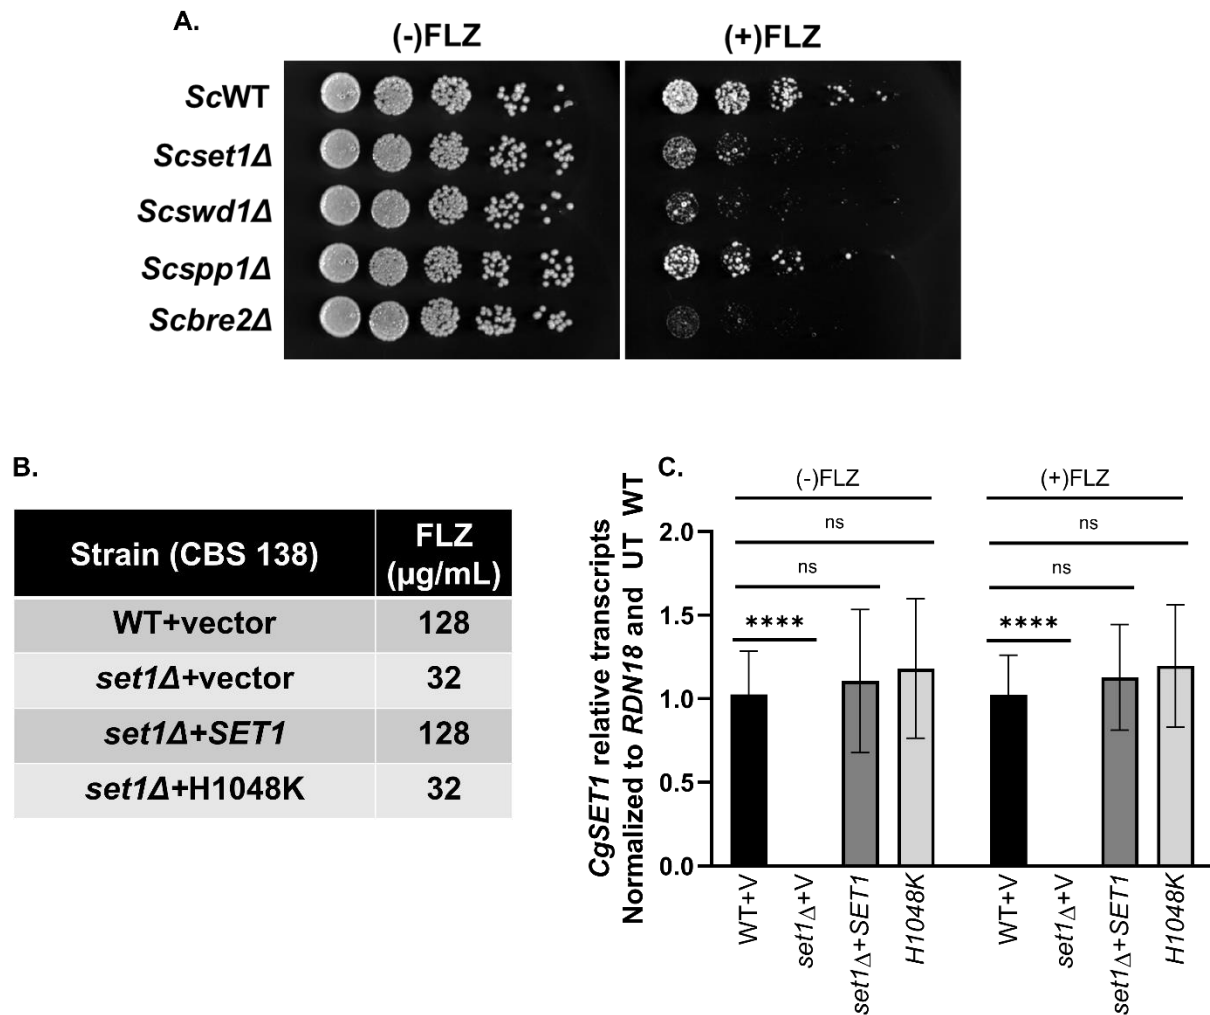

964  
 965 **FIG S1.** Loss of Set1 complex members results in altered azole efficacy. (A) Five-fold  
 966 serial dilution spot assays of the indicated *S. cerevisiae* strains were grown on SC  
 967 plates with or without 8 μg/ml fluconazole. (B) MIC assay of the indicated strains  
 968 performed in SC media at 35°C and results recorded after 24 hours of incubation. (C)  
 969 Expression of *SET1* was determined in the indicated mutants treated with and without  
 970 64 μg/ml fluconazole for 3 hr by qRT-PCR analysis. Gene expression analysis was set  
 971 relative to the untreated wild-type and expression was normalized to *RDN18* mRNA  
 972 levels. Data were analyzed from 4 biological replicates with three technical replicates  
 973 each. Statistics were performed using Graphpad Prism student t-test version 9.2.0.  
 974 \*\*\*\**p*<0.0001. Error bars represent SD.  
 975

976

977

Figure S2

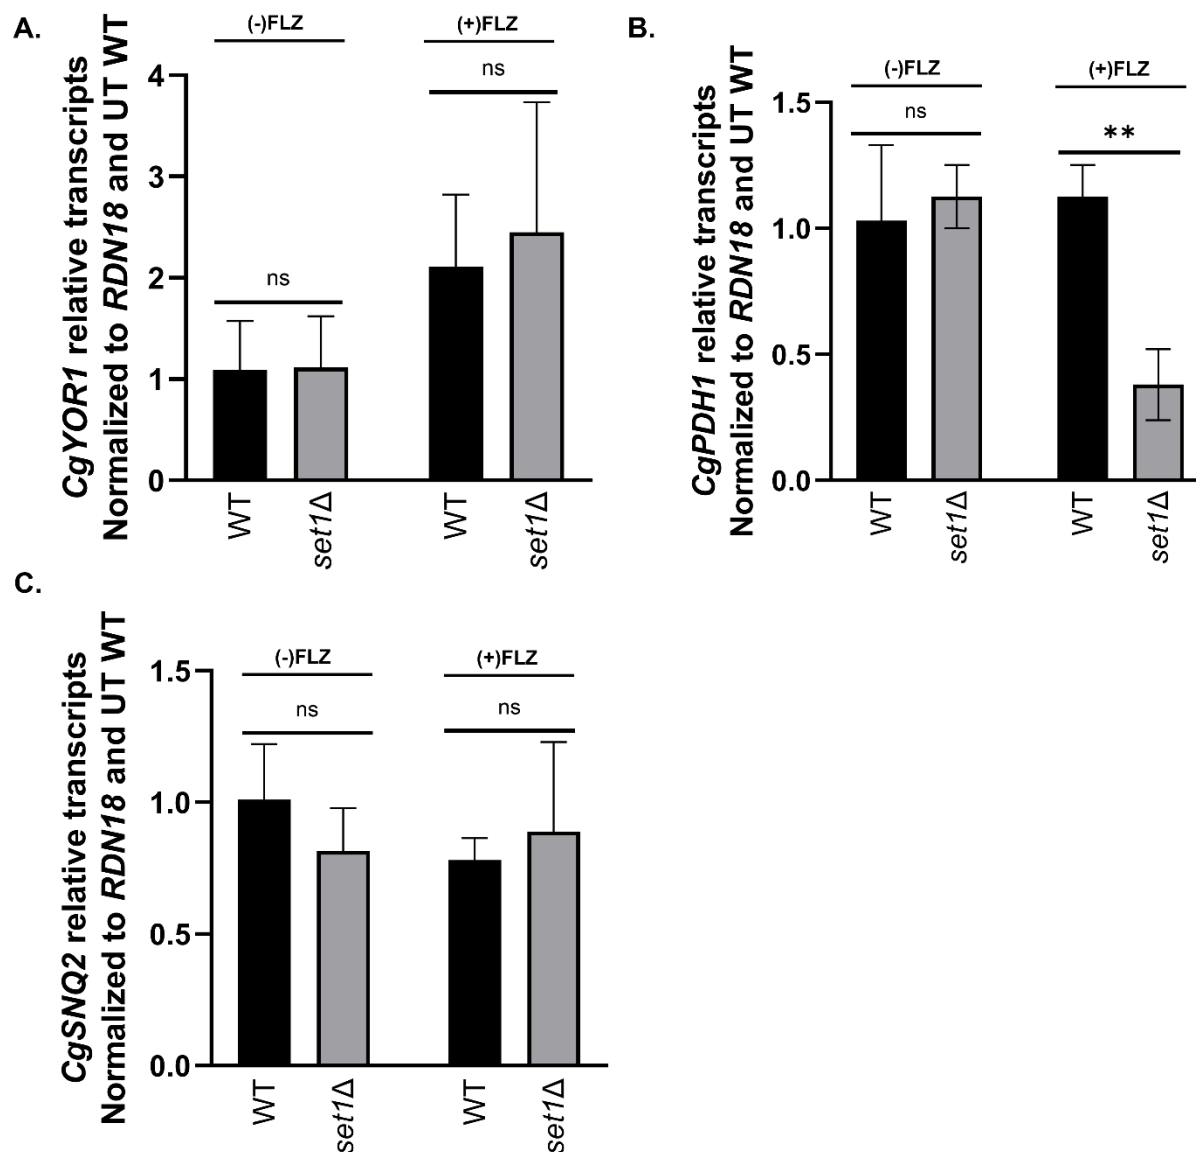

978

979 **Fig S2.** Transcript levels of drug transporters in a *set1Δ* strain compared to wild-type.  
980 Expression of the indicated genes were determined in the indicated mutants treated  
981 with and without 64  $\mu\text{g/ml}$  fluconazole for 3 hr by qRT-PCR analysis. Gene expression  
982 analysis was set relative to the untreated wild-type and expression was normalized to  
983 *RDN18* mRNA levels. Data were analyzed from  $\geq 3$  biological replicates with three  
984 technical replicates each. Statistics were performed using Graphpad Prism student t-  
985 test version 9.2.0. \*\* $p < 0.01$ . Error bars represent SD.

### Figure S3

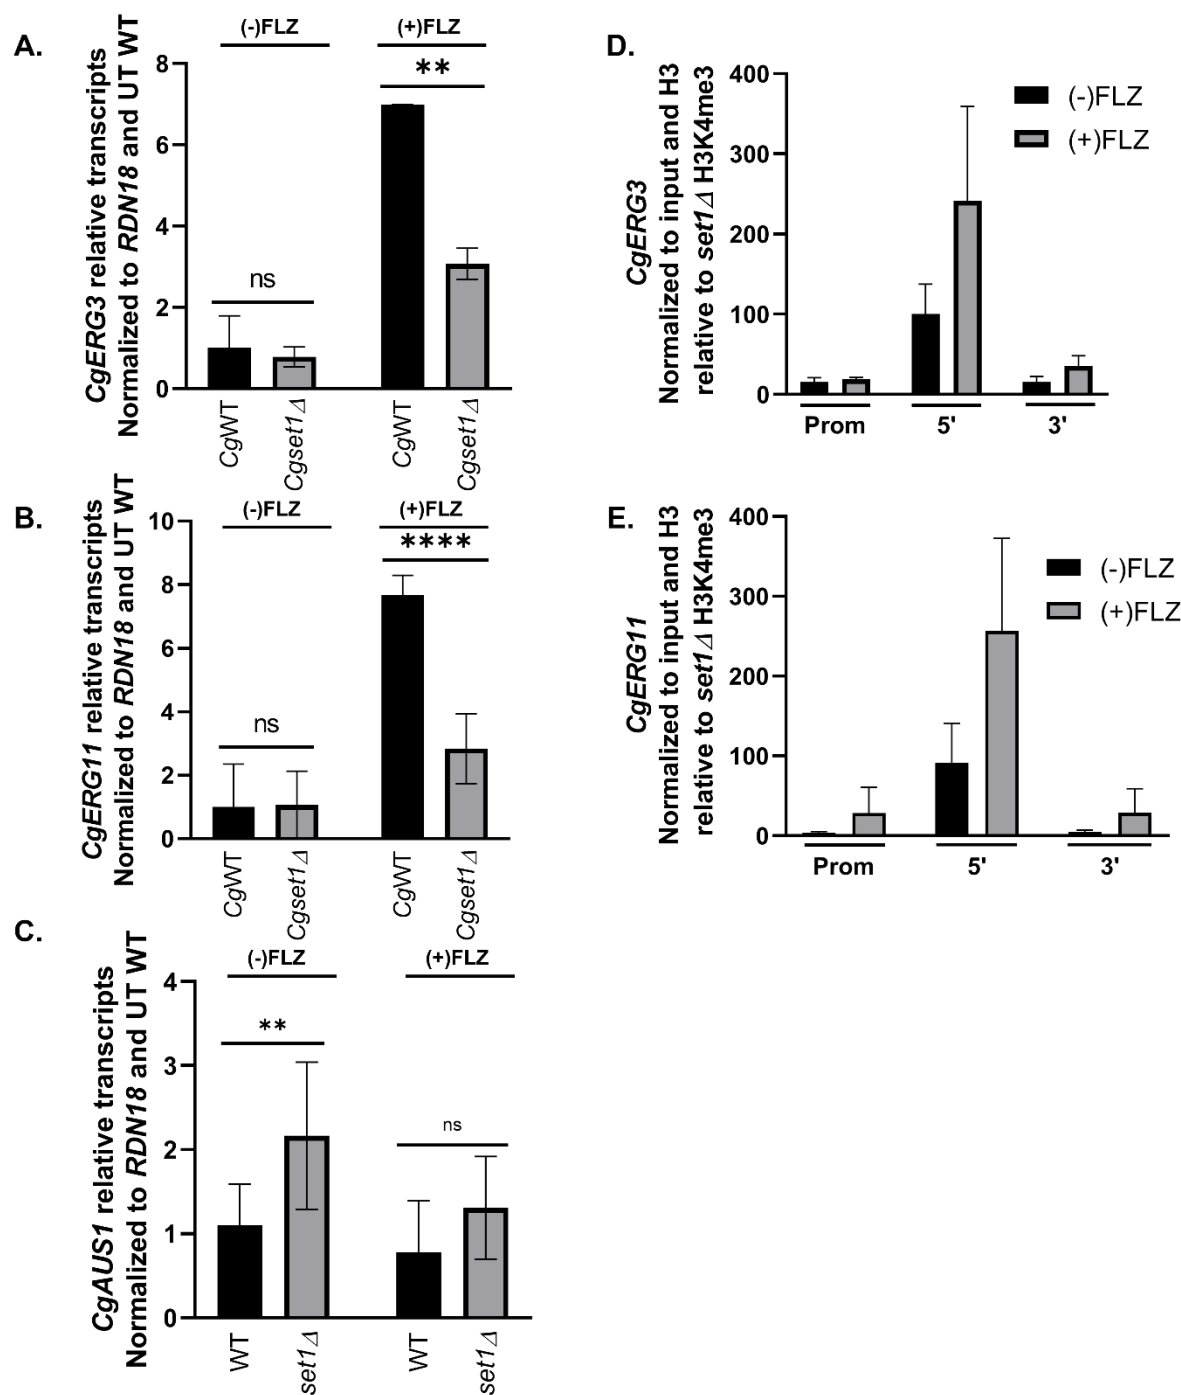

986

987 **Fig S3.** Histone H3K4 trimethylation is enriched on *ERG* gene chromatin and *Set1*-  
 988 mediated histone H3K4 methyltransferase activity is required for azole induction of *ERG*  
 989 genes in saturated cells. (A and B) Expression of genes was determined in the indicated  
 990 strains treated with and without 64 μg/ml fluconazole in a saturated culture for 3 hr by  
 991 qRT-PCR analysis. Gene expression analysis was set relative to the untreated wild-type  
 992 expression was normalized to *RDN18* mRNA levels. Data were analyzed from ≥ 3  
 993 biological replicates with three technical replicates each. (C) Expression of genes was

994 determined in the indicated strains treated with and without 64  $\mu\text{g}/\text{ml}$  fluconazole in an  
 995 exponential culture for 3 hr by qRT-PCR analysis. Gene expression analysis was set  
 996 relative to the untreated wild-type expression was normalized to *RDN18* mRNA levels.  
 997 Data were analyzed from  $\geq 3$  biological replicates with three technical replicates each.  
 998 (D and E) ChIP analysis of histone H3K4 tri-methylation levels at the promoter, 5', and  
 999 3' regions of *ERG11* and *ERG3* in a wild-type *C. glabrata* strain with and without 64  
 1000  $\mu\text{g}/\text{mL}$  fluconazole treatment in saturated cell cultures. ChIP analysis was set relative to  
 1001 a *set1 $\Delta$*  strain and normalized to histone H3 and DNA input levels. Data were analyzed  
 1002 from 3 biological replicates with three technical replicates each. Statistics were  
 1003 performed using Graphpad Prism student t-test version 9.2.0. \* $p < 0.05$ . \*\*\*\* $p < 0.0001$   
 1004 and \*\* $p < 0.01$ . Error bars represent SD.

1005 **Figure S4**

**A.**

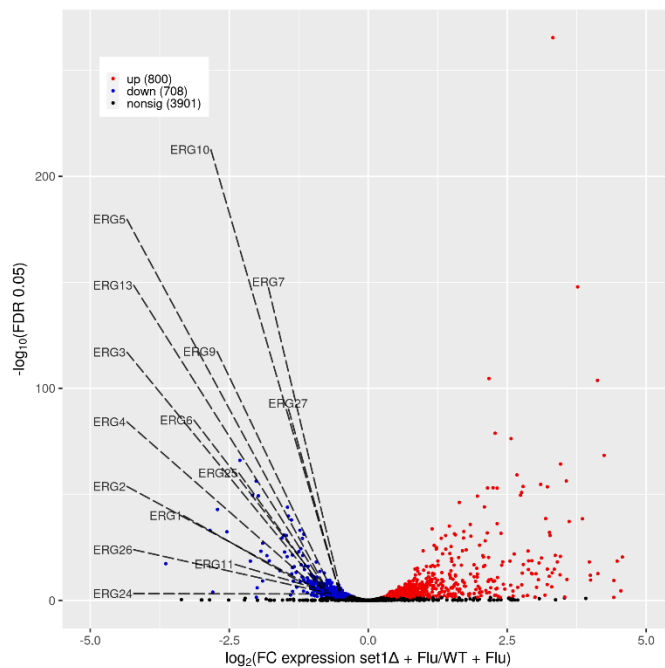

**B.**

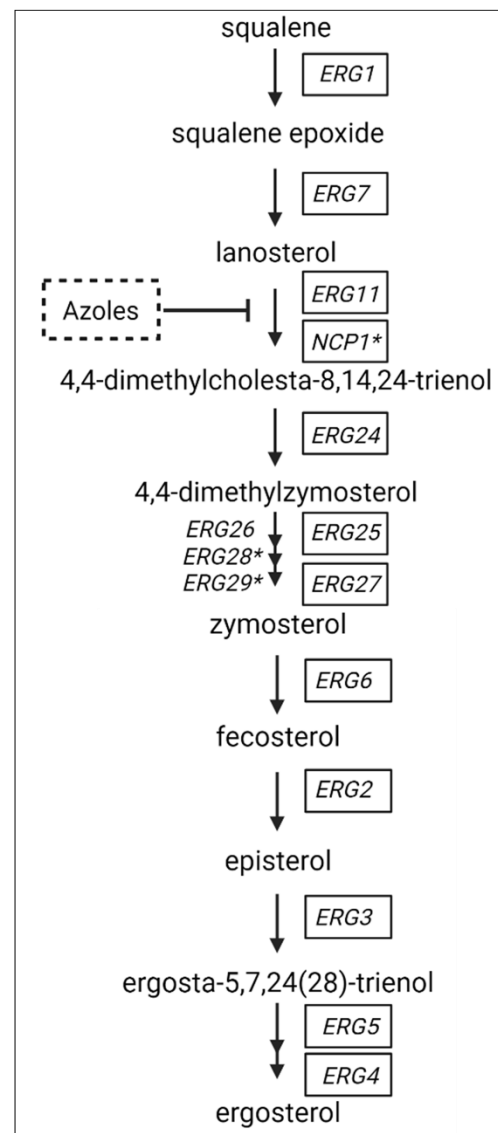

1006 **Fig S4.** Genes encoding enzymes of the late ergosterol pathway are down in a *set1Δ*  
 1007 strain upon azole treatment in *C. glabrata*. (A) Volcano plot showing the significance  
 1008  $[-\log_2(\text{FDR})]$ , y-axis] vs. the fold change (x-axis) of the DEGs identified in the *set1Δ*  
 1009 azole treated samples relative to WT azole treated samples. Genes with significant  
 1010 differential expression (FDR < 0.05) are highlighted in red or blue for up- and  
 1011 downregulated genes, respectively. Down-regulated *ERG* genes are labelled in the plot  
 1012 which include 12 of the *ERG* genes in the late pathway and two *ERG* genes in the early  
 1013 pathway. Black highlighted genes are considered nonsignificant. (B) Depiction of the  
 1014 late ergosterol pathway in *C. glabrata*. Azoles inhibit lanosterol 14- $\alpha$ -demethylase, the  
 1015 enzyme encoded by *ERG11*. *NCP1\** and *ERG28\** interact with ergosterol synthesizing  
 1016 enzymes. *ERG29\** is a protein of unknown function involved in ergosterol biosynthesis.  
 1017 Loss of *SET1* results in lower transcript levels of 12 of the 12 ergosterol synthesizing  
 1018 enzymes of the late pathway compared to a wild-type strain upon azole treatment.  
 1019 Genes with decreased transcript levels due the loss of *SET1* are surrounded by a solid  
 1020 square.

1021 **Supplemental Tables**

| Table S1.                        | Yeast Strains                                                                                                                                                             |                                                |                                  |
|----------------------------------|---------------------------------------------------------------------------------------------------------------------------------------------------------------------------|------------------------------------------------|----------------------------------|
| Strains                          | Genotype                                                                                                                                                                  | Reference                                      | Strain Name                      |
| <i>S. cerevisiae</i><br>BY4741   | <i>MAT<math>\alpha</math> his3<math>\Delta</math> leu2<math>\Delta</math>0 LYS2 met15<math>\Delta</math>0<br/>ura3<math>\Delta</math>0</i>                                | Open Biosystems                                | ScWT                             |
| <i>Scswd1<math>\Delta</math></i> | <i>MAT<math>\alpha</math> his3<math>\Delta</math> leu2<math>\Delta</math>0 LYS2 met15<math>\Delta</math>0<br/>ura3<math>\Delta</math>0 swd1<math>\Delta</math>::KanMX</i> | Open Biosystems                                | <i>Scswd1<math>\Delta</math></i> |
| <i>Scspp1<math>\Delta</math></i> | <i>MAT<math>\alpha</math> his3<math>\Delta</math> leu2<math>\Delta</math>0 LYS2 met15<math>\Delta</math>0<br/>ura3<math>\Delta</math>0 spp1<math>\Delta</math>::KanMX</i> | Open Biosystems                                | <i>Scspp1<math>\Delta</math></i> |
| <i>Scbre2<math>\Delta</math></i> | <i>MAT<math>\alpha</math> his3<math>\Delta</math> leu2<math>\Delta</math>0 LYS2 met15<math>\Delta</math>0<br/>ura3<math>\Delta</math>0 bre2<math>\Delta</math>::KanMX</i> | Open Biosystems                                | <i>Scbre2<math>\Delta</math></i> |
| SDBY1420                         | <i>MAT<math>\alpha</math> his3<math>\Delta</math> leu2<math>\Delta</math>0 LYS2 met15<math>\Delta</math>0<br/>ura3<math>\Delta</math>0 set1<math>\Delta</math>::HphMX</i> | Zhang et al. Yeast<br>2017                     | <i>Scset1<math>\Delta</math></i> |
| SDBY1600                         | <i>MAT<math>\alpha</math> his3<math>\Delta</math> leu2<math>\Delta</math>0 LYS2 met15<math>\Delta</math>0<br/>ura3<math>\Delta</math>0 HHT1::K4R</i>                      | This study                                     | <i>ScH3K4R1</i>                  |
| SDBY1601                         | <i>MAT<math>\alpha</math> his3<math>\Delta</math> leu2<math>\Delta</math>0 LYS2<br/>met15<math>\Delta</math>0ura3<math>\Delta</math>0 HHT1::K4R<br/>HHT2::K4R</i>         | This study                                     | <i>ScH3K4R2</i>                  |
| ATCC 2001<br>CgWT                | <i>C. glabrata</i> wild type strain                                                                                                                                       | <a href="http://www.atcc.org">www.atcc.org</a> | CgWT                             |
| SDBY1602                         | <i>set1<math>\Delta</math>::HphMX</i>                                                                                                                                     | This study                                     | <i>Cgset1<math>\Delta</math></i> |
| SDBY1603                         | <i>swd1<math>\Delta</math>::HphMX</i>                                                                                                                                     | This study                                     | <i>Cgswd1<math>\Delta</math></i> |
| SDBY1604                         | <i>spp1<math>\Delta</math>::HphMX</i>                                                                                                                                     | This study                                     | <i>Cgspp1<math>\Delta</math></i> |
| SDBY1605                         | <i>bre2<math>\Delta</math>::HphMX</i>                                                                                                                                     | This study                                     | <i>Cgbre2<math>\Delta</math></i> |
| SDBY1606                         | <i>pdr1<math>\Delta</math>::NatMX</i>                                                                                                                                     | This study                                     | <i>Cgpdr1<math>\Delta</math></i> |
| ATCC 200989<br>CgWT              | <i>his3<math>\Delta</math> trp1<math>\Delta</math> ura3<math>\Delta</math></i>                                                                                            | <a href="http://www.atcc.org">www.atcc.org</a> | CgWT                             |

SDBY1607 *his3Δ trp1Δ ura3Δ set1Δ::HphMX* This study *Cgset1Δ*

1022

**Table S2. Plasmids**

| Plasmid | Inserted Gene      | Promoter    | Vector  | Source        |
|---------|--------------------|-------------|---------|---------------|
| pGRB2.0 | None               |             | pGRB2.0 | Zordan et al. |
| pGRB2.0 | <i>SET1</i>        | <i>SET1</i> | pGRB2.0 | Zordan et al. |
| pGRB2.0 | <i>SET1/H1048K</i> | <i>SET1</i> | pGRB2.0 | Zordan et al. |

1023

**Table S3. Primers for qRT-PCR**

| Primer Name         | Sequence                 |
|---------------------|--------------------------|
| <i>CgRDN18-001F</i> | ACGGAGCCAGCGAGTCTAAC     |
| <i>CgRDN18-002R</i> | CGACGGAGTTTCACAAGATTACC  |
| <i>CgERG3-001F</i>  | TGGGAGCACCACGGTCTAAG     |
| <i>CgERG3-002R</i>  | CAGTCGGTGAAGAAGATGAAAGTG |
| <i>CgERG11-001F</i> | GGGTCCAAAGGGTCACGAA      |
| <i>CgERG11-002R</i> | GCAGCTTCAGCGGAAACATC     |
| <i>CgCDR1-001F</i>  | GTCTATGGAAGGTGCCGTCAA    |
| <i>CgCDR1-002R</i>  | TGAACCAGGTCTACCTAGCACAAC |
| <i>CgPDR1-001F</i>  | TCGGCGAGGGTAAATTCAAC     |
| <i>CgPDR1-002R</i>  | CAACTGCGTTTGATTCCCTTAAGC |
| <i>CgSET1-001F</i>  | CCAACCAAAGCCGATACTCATC   |
| <i>CgSET1-002R</i>  | GCGTTGACTACCGCGAGATT     |

1024

**Table S4. Probe sets for ChIP Analysis**

| Probe Name            | Sequence 5'-3'                                                                                           |
|-----------------------|----------------------------------------------------------------------------------------------------------|
| <i>ERG11 Promoter</i> | /56-FAM/CCTTGTTCC/ZEN/AACTACAATCGAGTGAGCT/3IABkFQ/<br>CGAATACGAGGCCATTTGTAAAC<br>CTGTGCTCCCATCTCACTATAAC |
| <i>ERG11 5'</i>       | /56-FAM/TCGTACTTC/ZEN/CAAGCTCTGCCATTGG/3IABkFQ/<br>GAGTACGTGAAGCTTGGTCTT<br>TGGCAAGGCGACCATAATAG         |
| <i>ERG11 3'</i>       | /56-FAM/CGGCATGAC/ZEN/TTAAGCTGGTTGTTTCG/3IABkFQ/<br>ACGGGATATACGCTGATTCATT<br>AGCAGCAAAGCCCTCTAAA        |
| <i>ERG3 Promoter</i>  | /56-FAM/AGCGAGAGC/ZEN/TGCTAGAGCTGAGAA/3IABkFQ/<br>GAGACTATACGAGTGTGCTCTTTG<br>TCTTCTTCCAGGCCTCATCT       |
| <i>ERG3 5'</i>        | /56-FAM/TCGACGACT/ZEN/CGTTGGTCAATGCTT/3IABkFQ/<br>CGACGATGTGTATGCCAAGA<br>ATGCAGCAGCGTAGAGTTAG           |
| <i>ERG3 3'</i>        | /56-FAM/CCAAGAGGT/ZEN/GGAAGGTGACGACAC/3IABkFQ/<br>AGAAACCGCCGCTTACAT<br>CCGGTGTTCCTGTCTAGTT              |



1025

| <b>Table S5.</b>          |                       | <b>qRT-PCR Values</b> |                |                           |          |                |
|---------------------------|-----------------------|-----------------------|----------------|---------------------------|----------|----------------|
| <b>Figure 4A: qRT-PCR</b> |                       |                       |                |                           |          |                |
| <b>Gene</b>               | <b>Strain</b>         | <b>Condition</b>      | <b>Mean RQ</b> | <b>Standard Deviation</b> | <b>N</b> | <b>P-Value</b> |
| <i>CgCDR1</i>             | <i>CgWT</i>           | Untreated             | 1              | 0.750623                  | 7        | n.s.           |
| <i>CgCDR1</i>             | <i>CgWT</i>           | (+) fluconazole       | 4.51           | 1.071572                  | 7        | n.s.           |
| <i>CgCDR1</i>             | <i>Cgset1Δ</i>        | Untreated             | 1.1            | 0.972961                  | 7        | n.s.           |
| <i>CgCDR1</i>             | <i>Cgset1Δ</i>        | (+) fluconazole       | 4.04           | 0.608125                  | 7        | n.s.           |
| <b>Figure 4B: qRT-PCR</b> |                       |                       |                |                           |          |                |
| <b>Gene</b>               | <b>Strain</b>         | <b>Condition</b>      | <b>Mean RQ</b> | <b>Standard Deviation</b> |          | <b>P-Value</b> |
| <i>CgPDR1</i>             | <i>CgWT</i>           | Untreated             | 1              | 0.257724                  | 3        | n.s.           |
| <i>CgPDR1</i>             | <i>CgWT</i>           | (+) fluconazole       | 2.29           | 0.204429                  | 3        | n.s.           |
| <i>CgPDR1</i>             | <i>Cgset1Δ</i>        | Untreated             | 1.02           | 0.3498374                 | 3        | n.s.           |
| <i>CgPDR1</i>             | <i>Cgset1Δ</i>        | (+) fluconazole       | 2.29           | 0.249992                  | 3        | n.s.           |
| <b>Figure 5E: qRT-PCR</b> |                       |                       |                |                           |          |                |
| <b>Gene</b>               | <b>Strain</b>         | <b>Condition</b>      | <b>Mean RQ</b> | <b>Standard Deviation</b> |          | <b>P-Value</b> |
| <i>CgERG11</i>            | <i>CgWT</i>           | Untreated             | 1              | 0.32                      | 3        | n.s.           |
| <i>CgERG11</i>            | <i>CgWT</i>           | (+) fluconazole       | 10.29          | 0.23                      | 3        | n.s.           |
| <i>CgERG11</i>            | <i>Cgset1Δ</i>        | Untreated             | 1.32           | 0.65                      | 3        | n.s.           |
| <i>CgERG11</i>            | <i>Cgset1Δ</i>        | (+) fluconazole       | 3.83           | 0.26                      | 3        | <0.0001        |
| <b>Figure 5F: qRT-PCR</b> |                       |                       |                |                           |          |                |
| <b>Gene</b>               | <b>Strain</b>         | <b>Condition</b>      | <b>Mean RQ</b> | <b>Standard Deviation</b> |          | <b>P-Value</b> |
| <i>CgERG3</i>             | <i>CgWT</i>           | Untreated             | 1              | 0.1                       | 3        | n.s.           |
| <i>CgERG3</i>             | <i>CgWT</i>           | (+) fluconazole       | 3.63           | 0.69                      | 3        | n.s.           |
| <i>CgERG3</i>             | <i>Cgset1Δ</i>        | Untreated             | 1.14           | 0.05                      | 3        | n.s.           |
| <i>CgERG3</i>             | <i>Cgset1Δ</i>        | (+) fluconazole       | 0.9            | 0.18                      | 3        | <0.01          |
| <b>Figure 6C: qRT-PCR</b> |                       |                       |                |                           |          |                |
| <b>Gene</b>               | <b>Strain</b>         | <b>Condition</b>      | <b>Mean RQ</b> | <b>Standard Deviation</b> |          | <b>P-Value</b> |
| <i>CgERG11</i>            | <i>CgWT+V</i>         | Untreated             | 0.951          | 0.384                     | 4        | n.s.           |
| <i>CgERG11</i>            | <i>CgWT+V</i>         | (+) fluconazole       | 6.791          | 1.988                     | 4        | n.s.           |
| <i>CgERG11</i>            | <i>Cgset1Δ+V</i>      | Untreated             | 1.342          | 0.549                     | 4        | n.s.           |
| <i>CgERG11</i>            | <i>Cgset1Δ+V</i>      | (+) fluconazole       | 2.603          | 1.043                     | 4        | <0.01          |
| <i>CgERG11</i>            | <i>Cgset1Δ/SET1</i>   | Untreated             | 1.227          | 0.631                     | 4        | n.s.           |
| <i>CgERG11</i>            | <i>Cgset1Δ/SET1</i>   | (+) fluconazole       | 6.438          | 2.783                     | 4        | n.s.           |
| <i>CgERG11</i>            | <i>Cgset1Δ/H1048K</i> | Untreated             | 1.346          | 0.429                     | 4        | n.s.           |
| <i>CgERG11</i>            | <i>Cgset1Δ/H1048K</i> | (+) fluconazole       | 3.370          | 0.870                     | 4        | <0.05          |
| <b>Figure 6D: qRT-PCR</b> |                       |                       |                |                           |          |                |
| <b>Gene</b>               | <b>Strain</b>         | <b>Condition</b>      | <b>Mean RQ</b> | <b>Standard Deviation</b> |          | <b>P-Value</b> |
| <i>CgERG3</i>             | <i>CgWT+V</i>         | Untreated             | 1.266          | 1.138                     | 4        | n.s.           |
| <i>CgERG3</i>             | <i>CgWT+V</i>         | (+) fluconazole       | 5.686          | 2.144                     | 4        | n.s.           |
| <i>CgERG3</i>             | <i>Cgset1Δ+V</i>      | Untreated             | 0.814          | 0.345                     | 4        | n.s.           |
| <i>CgERG3</i>             | <i>Cgset1Δ+V</i>      | (+) fluconazole       | 1.512          | 0.429                     | 4        | n.s.           |
| <i>CgERG3</i>             | <i>Cgset1Δ/SET1</i>   | Untreated             | 1.034          | 0.64                      | 4        | n.s.           |
| <i>CgERG3</i>             | <i>Cgset1Δ/SET1</i>   | (+) fluconazole       | 7.518          | 4.232                     | 4        | <0.001         |



|               |                       |                 |       |       |   |       |
|---------------|-----------------------|-----------------|-------|-------|---|-------|
| <i>CgERG3</i> | <i>Cgset1Δ/H1048K</i> | Untreated       | 0.888 | 0.206 | 4 | n.s.  |
| <i>CgERG3</i> | <i>Cgset1Δ/H1048K</i> | (+) fluconazole | 2.357 | 0.54  | 4 | <0.05 |

**Figure 6A: ChIP qRT-PCR**

| Gene           | Strain                  | Condition       | Mean RQ | Standard Deviation |   | P-Value |
|----------------|-------------------------|-----------------|---------|--------------------|---|---------|
| <i>CgERG11</i> | <i>CgWT</i><br>promoter | Untreated       | 11.24   | 5.568              | 3 | n.s.    |
| <i>CgERG11</i> | <i>CgWT</i><br>promoter | (+) fluconazole | 22.138  | 12.012             | 3 | n.s.    |
| <i>CgERG11</i> | <i>CgWT</i> 5'          | Untreated       | 62.531  | 1.452              | 3 | n.s.    |
| <i>CgERG11</i> | <i>CgWT</i> 5'          | (+) fluconazole | 133.274 | 20.388             | 3 | <0.001  |
| <i>CgERG11</i> | <i>CgWT</i> 3'          | Untreated       | 11.412  | 3.193              | 3 | n.s.    |
| <i>CgERG11</i> | <i>CgWT</i> 3'          | (+) fluconazole | 26.019  | 7.85               | 3 | <0.05   |

**Figure 6B: ChIP qRT-PCR**

| Gene          | Strain         | Condition       | Mean RQ | Standard Deviation |   | P-Value |
|---------------|----------------|-----------------|---------|--------------------|---|---------|
| <i>CgERG3</i> | <i>CgWT</i>    | Untreated       | 35.768  | 18.274             | 3 | n.s.    |
| <i>CgERG3</i> | <i>CgWT</i>    | (+) fluconazole | 57.996  | 35.319             | 3 | n.s.    |
| <i>CgERG3</i> | <i>CgWT</i> 5' | Untreated       | 145.877 | 42.565             | 3 | n.s.    |
| <i>CgERG3</i> | <i>CgWT</i> 5' | (+) fluconazole | 281.392 | 69.117             | 3 | <0.05   |
| <i>CgERG3</i> | <i>CgWT</i> 3' | Untreated       | 50.262  | 13.737             | 3 | n.s.    |
| <i>CgERG3</i> | <i>CgWT</i> 3' | (+) fluconazole | 133.95  | 59.062             | 3 | n.s.    |

1026

1027
